1 **Members of the abscisic acid co-receptor PP2C protein family mediate salicylic acid-**  
2 **abscisic acid crosstalk**

3 Murli Manohar<sup>1</sup>, Dekai Wang<sup>1§</sup>, Patricia M. Manosalva<sup>1\*</sup>, Hyong Woo Choi<sup>1</sup>, Erich Kombrink<sup>2</sup>  
4 and Daniel F. Klessig<sup>1#</sup>

5 <sup>1</sup>Boyce Thompson Institute, Cornell University, 533 Tower Rd, Ithaca, NY 14853, USA.

6 <sup>2</sup>Chemical Biology Laboratory, Max Plank Institute for Plant Breeding Research, Carl-von-  
7 Linne-Weg 10, Cologne D-50829, Germany

8 #Correspondence: Daniel F. Klessig

9 533 Tower Road, Ithaca, NY, 14853

10 Email: [dfk8@cornell.edu](mailto:dfk8@cornell.edu)

11 Phone: 607-254-4560 and 607-255-2271

12 <sup>§</sup> Institute of Crop and Nuclear Technology Utilization, Zhejiang Academy of Agricultural  
13 Sciences, Hangzhou, Zhejiang, China, 310021

14 \*Present address: Department of Plant Pathology and Microbiology, University of California  
15 Riverside, Riverside, CA 92521

16

17

18

19

20

21 **Abstract**

22 The interplay between abscisic acid (ABA) and salicylic acid (SA) influences plant responses to  
23 various (a)biotic stresses; however, the underlying mechanism(s) for this crosstalk is largely  
24 unknown. Here we report that type 2C protein phosphatases (PP2Cs), some of which are negative  
25 regulators of ABA signaling, bind SA. SA binding suppressed the ABA-enhanced interaction  
26 between these PP2Cs and various ABA receptors belonging to the PYR/PYL/RCAR protein  
27 family. Additionally, SA suppressed ABA-enhanced degradation of PP2Cs and ABA-induced  
28 stabilization of SnRK2s. Supporting SA's role as a negative regulator of ABA signaling,  
29 exogenous SA suppressed ABA-induced gene expression, whereas SA-deficient *sid2-1* mutants  
30 displayed heightened PP2C degradation and hypersensitivity to ABA-induced suppression of seed  
31 germination. Together, these results suggest a new molecular mechanism through which SA  
32 antagonizes ABA signaling. A better understanding of the crosstalk between these hormones is  
33 important for improving the sustainability of agriculture in the face of climate change.

34

35

36

## 37 **Introduction**

38 Elaborate hormone signaling networks allow plants to perceive and respond adaptively to various  
39 biotic and abiotic stresses (Tuteja, 2007; Raghavendra *et al.*, 2010). One of the vital hormones that  
40 plays a central role in the adaptation to abiotic stresses, particularly drought and salt stresses, is  
41 ABA. In addition, ABA is involved in regulating plant growth and developmental processes under  
42 non-stress conditions (Raghavendra *et al.*, 2010) and modulating defense responses following  
43 pathogen attack (Robert-Seilaniantz *et al.*, 2011; Denance *et al.*, 2013). Because of its essential  
44 role in multiple physiological processes both under stressed and non-stressed conditions, the ABA  
45 signaling pathway has been studied intensively during the last two decades. Initial attempts to  
46 identify ABA receptors were met with controversy and frustration. Several proteins were proposed  
47 to be ABA receptors, but their exact role in ABA response and their associated mechanisms were  
48 never established (Hauser *et al.*, 2011).

49 The discovery that members of the pyrabactin resistance 1/PYR1-like/regulatory  
50 component of ABA receptor (PYR/PYL/RCAR) protein family are ABA receptors, and that they  
51 interact with members of the type 2C protein phosphatase (PP2C) protein subfamily, was a major  
52 breakthrough in dissecting the ABA signaling pathway (Fujii *et al.*, 2009; Ma *et al.*, 2009;  
53 Miyazono *et al.*, 2009; Park *et al.*, 2009; Santiago *et al.*, 2009; Soon *et al.*, 2012). In the absence  
54 of ABA, PP2Cs are able to bind and dephosphorylate members of the sucrose non-fermenting 1-  
55 related subfamily 2 protein kinase (SnRK2) family. This negatively regulates ABA signaling  
56 because autophosphorylation is required for SnRK2 kinase activity, and thus their ability to  
57 transduce the ABA signal by phosphorylating downstream targets. In the presence of ABA, the  
58 ABA-receptor complex tightly binds to PP2Cs, thereby preventing PP2C-mediated  
59 dephosphorylation of SnRK2. This, in turn, allows activated SnRK2s to relay the ABA signal.

60 The reversible phosphorylation of proteins by protein kinases and phosphatases is an  
61 important mechanism for regulating many biological processes. In contrast to eukaryotic protein  
62 kinases, whose primary and three-dimensional structures are very similar, protein phosphatases  
63 are diverse. Depending on their substrate specificity, protein phosphatases can be divided into two  
64 classes, serine/threonine (Ser/Thr) or tyrosine phosphatases (Schweighofer *et al.*, 2004; Fuchs *et al.*,  
65 2013; Singh *et al.*, 2015). The Ser/Thr phosphatases have been further organized into the  
66 phosphoprotein phosphatase (PPP) and metal-dependent protein phosphatase (PPM) families. In

67 plants, PP2Cs, which belong to the PPM family, represent a major portion of the phosphatase-  
68 encoding gene family. To date, 80 or more genes have been identified in the Arabidopsis, tomato,  
69 rice and hot pepper genomes. Phylogenetic analyses have further divided the PP2C families from  
70 these plant species into ten or more subclades designated alphabetically from A onward (Fuchs *et al.*  
71 *al.*, 2013; Singh *et al.*, 2015).

72 Of the PP2C subclades, members of “clade A” have been studied the most extensively, as  
73 they negatively regulate ABA signaling in various plant species. In Arabidopsis, clade A proteins  
74 such as ABA-insensitive 1 (ABI1), ABI2, Hypersensitive to ABA 1 (HAB1), and PP2CA/AHG3,  
75 have been shown to mediate ABA-induced responses to abiotic and biotic stresses via their  
76 interaction with SnRK2s and PYR/PYL/RCARs (de Torres-Zabala *et al.*, 2007; Fujii *et al.*, 2009;  
77 Santiago *et al.*, 2012; Soon *et al.*, 2012; Lim *et al.*, 2014). Functional studies of PP2C proteins  
78 from other clades are limited, but they suggest that some of these proteins are involved in  
79 responding to (a)biotic stresses. For instance, the clade B member AP2C1 (*Arabidopsis*  
80 phosphatase 2C1) and its ortholog MP2C from *Medicago sativa* regulate the activity of stress-  
81 induced mitogen-activated protein kinases (MAPKs; (Meskiene *et al.*, 2003; Schweighofer *et al.*,  
82 2004), and the clade F member PIA1 (PP2C induced by AvrRpm1) regulates immune responses  
83 in Arabidopsis (Widjaja *et al.*, 2010). By contrast, clades C and D contain PP2Cs that regulate  
84 developmental processes (Schweighofer *et al.*, 2004; Fuchs *et al.*, 2013; Singh *et al.*, 2015).  
85 Members of clade C, including POL (Poltergeist) and PLL (POL-like), control shoot and root  
86 meristem formation and embryo formation (Song & Clark, 2005), whereas members of clade D  
87 negatively regulate the activity of plasma membrane H<sup>+</sup>-ATPases, and thus cell expansion in the  
88 absence of auxin (Spartz *et al.*, 2014).

89 SA is another important plant hormone involved in diverse physiological and metabolic  
90 processes, including plant responses to various abiotic stresses. In addition, SA is an essential  
91 regulator of plant immune responses (Vlot *et al.*, 2009; Manohar *et al.*, 2015; Klessig *et al.*, 2016).  
92 While several recent studies have identified components of SA signaling networks and revealed  
93 some SA-mediated signaling mechanisms, a full picture of SA-based signaling in plants is far from  
94 complete. Indeed, the identity of the SA receptor(s) remains unclear. It was recently proposed that  
95 Non-expresser of PR1 (NPR1), which functions as a master regulator of SA-mediated immune  
96 signaling, is an SA receptor (Wu *et al.*, 2012). In contrast, Fu and coworkers (2012) suggested that

97 NPR1's two homologs, NPR3 and NPR4, rather than NPR1, are SA receptors. Since NPR3 and  
98 NPR4 are adaptors for Cullin 3 ubiquitin E3 ligase, they may regulate the SA signaling pathway  
99 by fine-tuning NPR1 protein levels via degradation (Fu *et al.*, 2012). In addition, nearly 30 SA-  
100 binding proteins (SABPs) have been identified (Klessig *et al.*, 2016). These proteins exhibit a wide  
101 range of affinities for SA, and SA binding alters their activities. Given that SA levels vary  
102 dramatically within a plant depending on the subcellular compartment, tissue type, developmental  
103 stage and external cues, such as infection, these findings raise the possibility that SA exerts its  
104 effects by interacting with multiple targets, rather than a small number of receptors.

105         Although SA's role in activating disease resistance and ABA's role in signaling abiotic  
106 stress responses are well-known, it is only recently becoming apparent that ABA also influences  
107 immune responses (Robert-Seilaniantz *et al.*, 2011; Denance *et al.*, 2013). ABA treatment  
108 suppressed defense responses and enhanced plant susceptibility to certain bacterial and fungal  
109 pathogens (Ward *et al.*, 1989; McDonald & Cahill, 1999; Mohr & Cahill, 2003; Thaler & Bostock,  
110 2004; De Torres Zabala *et al.*, 2009; Robert-Seilaniantz *et al.*, 2011). Additionally, the virulence  
111 of *Pseudomonas syringae* in Arabidopsis was dependent on manipulation of the ABA signaling  
112 pathway by secreted bacterial effectors (de Torres-Zabala *et al.*, 2007). Growing evidence also  
113 indicates that there is substantial crosstalk between the ABA and SA pathways during immune  
114 signaling (de Torres-Zabala *et al.*, 2007; Yasuda *et al.*, 2008). Arabidopsis mutants deficient in  
115 ABA synthesis or response not only exhibited reduced susceptibility to pathogen infection, but  
116 also showed enhanced expression of SA-responsive genes, such as *Pathogenesis-Related Protein*  
117 *-1 (PR-1)* and *PR-4* (Audenaert *et al.*, 2002; Thaler & Bostock, 2004; Sanchez-Vallet *et al.*, 2012).  
118 Conversely, Arabidopsis overexpressing RCAR3, which confers increased ABA sensitivity,  
119 displayed enhanced susceptibility to *P. syringae* DC3000 infection, which correlated with  
120 decreased expression of *PR-1* and *NPR1* (Lim *et al.*, 2014). Further demonstrating the antagonistic  
121 interaction between ABA and SA, exogenous ABA suppressed the ability of an SA functional  
122 analog to enhance pathogen resistance in Arabidopsis, while pretreatment with this analog  
123 suppressed NaCl-induced expression of several ABA biosynthetic or responsive genes (Yasuda *et*  
124 *al.*, 2008). ABA appears to suppress immune responses by down-regulating SA biosynthesis (de  
125 Torres-Zabala *et al.*, 2007; Yasuda *et al.*, 2008); however, the mechanism through which SA  
126 inhibits ABA signaling is unknown.

127           In previous studies, we have identified several SABPs that are involved in various biotic  
128 and abiotic stress responses (Tian *et al.*, 2012; Manohar *et al.*, 2015). Here, we identify PP2Cs  
129 from clade A and D as novel SABPs and show that SA binding to these PP2Cs suppresses their  
130 ABA-enhanced interaction with the ABA receptors. In addition, SA suppresses ABA-induced  
131 degradation of PP2Cs and suppresses ABA-mediated stabilization of SnRK2s. Combined with the  
132 demonstration that SA treatment antagonizes ABA-induced gene expression and SA deficient  
133 *sid2-1* mutants are ABA hypersensitive, these results suggest that SA antagonizes ABA signaling  
134 through multiple mechanisms.

135

136

137

138

139

140

141

142

143

144

145

146

147

148

149

150

151

## 152 Results

### 153 Identification of PP2Cs as novel SA-binding proteins

154 To help define the SA signaling network in plants, we developed several high-throughput screens  
155 capable of identifying SABPs on a genome-wide scale (Tian *et al.*, 2012; Choi *et al.*, 2015;  
156 Manohar *et al.*, 2015). In one screen, protein extracts prepared from Arabidopsis leaves were  
157 subjected to affinity chromatography on a Pharmalink column to which SA was attached. After  
158 stringent washing with the biologically inactive SA analog 4-hydroxy benzoic acid (4-HBA), SA-  
159 bound proteins on the column were eluted with excess SA. The eluted proteins were analyzed by  
160 mass spectroscopy and a PP2C belonging to clade D (PP2C-D4; At3g55050) was identified along  
161 with other putative SABPs. Recombinant histidine-tagged PP2C-D4 was produced in *Escherichia*  
162 *coli* and the purified protein was further assessed for SA-binding activity using three different  
163 assays, including surface plasmon resonance (SPR), photoaffinity crosslinking, and size-exclusion  
164 chromatography. SPR analysis was performed with a CM5 sensor chip to which the SA derivative  
165 3-aminoethyl SA (3AESA) was immobilized via an amide bond. Binding to 3AESA was detected  
166 when purified PP2C-D4 was passed over the sensor chip (Figure 1A). In the presence of increasing  
167 concentrations of SA, PP2C-D4 binding to the 3AESA-immobilized sensor chip was modestly  
168 reduced (Figure 1A). Similar to these results, the photoaffinity labeling approach indicated that  
169 PP2C-D4 bound and was crosslinked to 4-azido SA (4AzSA). This binding also was suppressed  
170 by SA in a dose-dependent manner (Figure 1B), arguing that PP2C-D4 binding to both 3AESA  
171 and 4AzSA represents authentic SA-binding activity. PP2C-D4's ability to bind SA also was  
172 confirmed by size-exclusion chromatography using [<sup>3</sup>H]SA; binding to [<sup>3</sup>H]SA was partially  
173 suppressed by excess unlabeled SA, but not by excess amount of 4-HBA (Figure 1C). An  
174 independent, parallel screen using a SA-derived ligand in combination with the yeast three-hybrid  
175 technology, which relies on the *in vivo* interaction between the ligand (small molecule) and its  
176 protein target in the yeast nucleus, also identified PP2C-D4 (called PP2C6 in (Cottier *et al.*, 2011)).  
177 Based on these five independent assays, we conclude that PP2C-D4 is a true SABP.

178 Several clade A PP2C family members, including ABI1, ABI2, and HAB1, have been  
179 identified as core components of the ABA signaling network (Soon *et al.*, 2012). This prompted  
180 us to test whether these proteins also bind SA. Like PP2C-D4, recombinant ABI1 and ABI2 bound  
181 the 3AESA-immobilized sensor chip and crosslinked with 4AzSA (Figure 1D, 1E, 1G, 1H). The

182 ability of ABI1 and ABI2 to bind 3AESA and crosslink to 4AzSA also was partially suppressed  
183 by SA in a dose-dependent manner. ABI2's binding to [<sup>3</sup>H]SA was comparable to that of PP2C-  
184 D4 and this binding was partially suppressed by excess unlabeled SA but not by excess 4-HBA,  
185 while ABI1 exhibited relatively weak binding to [<sup>3</sup>H]SA and suppression by excess unlabeled SA  
186 (Figure 1F; 1I). Interestingly, SA suppressed the binding of these proteins to 3AESA more  
187 effectively than that of PP2C-D4 (Figure 1D, 1G). In contrast, HAB1 displayed much weaker  
188 binding to the 3AESA-immobilized sensor chip (Supporting Figure 1A). The ability of  
189 phosphoprotein phosphatase 2A regulatory subunit A (PP2A), a component of phosphatases  
190 belonging to the PPP family, also was tested for SA binding. This protein was previously identified  
191 during our screens, but it failed to meet the criteria as an SABP (Manohar *et al.*, 2015). Consistent  
192 with these results, PP2A exhibited very weak binding to the 3AESA-immobilized sensor chip  
193 (Supporting Figure 1B). Whether other key components involved in ABA signaling also bind SA  
194 was then assessed. Size-exclusion chromatography revealed little or no binding of [<sup>3</sup>H]SA by three  
195 members of the PYR/PYL/RCAR family of ABA receptors (PYL1, PYL2, and PYR1) or by three  
196 SnRK2s (SnRK2.2, 2.3, and 2.6; Supporting Figure 1C). Likewise, SnRK2.2 displayed only very  
197 low-level binding to the 3AESA-immobilized sensor chip (Supporting Figure 1D). Together, these  
198 results suggest that SA preferentially interacts with specific PP2C family members, but not with  
199 other major components of the ABA signaling pathway.

200         Since clade A PP2Cs are negative regulators of the ABA signaling pathway, we tested  
201 whether the presence of ABA affects PP2C-SA interactions by flowing the PP2Cs over 3AESA-  
202 immobilized sensor chips in the absence or presence of ABA. Notably, binding of PP2C-D4, ABI1,  
203 and ABI2 to 3AESA was significantly enhanced in the presence of ABA (Figure 2). This ABA-  
204 induced enhancement was suppressed by excess SA, further arguing that 3AESA binding by these  
205 PP2Cs represents authentic SA-binding activity. In contrast, ABA failed to enhance the weak  
206 binding of HAB1 and PP2A or to enable SnRK2.2 to bind 3AESA (Supporting Figure 1A, 1B,  
207 1D).

### 208 **SA suppresses the ABA-enhanced interaction between PP2Cs and ABA receptors**

209 To assess whether SA binding by PP2Cs alters their ability to interact with ABA receptors, SPR  
210 was performed. Purified PYL1 was immobilized on the CM5 sensor chip via an amide bond and  
211 interactions were detected by flowing purified PP2C-D4, ABI1, or ABI2 over the sensor chip.



212 Dose-dependent binding responses were obtained with all three PP2Cs tested, and this binding was  
213 enhanced in the presence of ABA (Figure 3; Supporting Figure 2). Notably, SA partially  
214 suppressed the ABA-enhanced interaction between PYL1 and all three PP2Cs (Figure 3). In the  
215 absence of ABA, SA slightly enhanced the interaction between PYL1 and PP2C-D4, but modestly  
216 suppressed binding by ABI1 and ABI2. SPR analysis with PYL2 and PYR1 revealed similarly  
217 dosage-dependent binding to the PP2Cs, that was further enhanced in the presence of ABA  
218 (Supporting Figures 3 & 4). Furthermore, this ABA-enhanced binding was suppressed by SA,  
219 although the level of suppression varied depending on the identity of the interacting proteins. For  
220 example, SA only weakly suppressed the ABA-enhanced interactions between PYR1 and all three  
221 PP2Cs, while interactions between these PP2Cs and either PYL1 or PYL2 were more strongly  
222 suppressed by SA (Figure 3, Supporting Figures 3 & 4). The ABA-enhanced interactions between  
223 PP2C-D4 and PYL1 or PYL2 also were suppressed less effectively by SA than the interactions  
224 between these ABA receptors and other PP2Cs (Figure 3, Supporting Figure 3). Interestingly, SA  
225 alone consistently enhanced the interaction between PP2C-D4 and all three ABA receptors, in  
226 some cases by a substantial amount (Figure 3, Supporting Figures 3 & 4).

## 227 **SA suppresses ABA-enhanced degradation of PP2Cs and ABA-induced stabilization of** 228 **SnRK2s**

229 Proteolysis plays an important role in regulating plant responses to various stresses by fine-tuning  
230 the turnover of key signaling components (Vierstra, 2009). Recent studies in Arabidopsis and rice  
231 have demonstrated that all three key components of ABA signaling, including PYR/PYL/RCARs,  
232 PP2Cs, and SnRK2s, are regulated by controlled proteolysis (Irigoyen *et al.*, 2014; Kong *et al.*,  
233 2015; Lin *et al.*, 2015). For example, ABA promotes degradation of ABI1, but it suppresses  
234 degradation of certain PYR/PYL/RCARs and SnRK2s (Kong *et al.*, 2015; Lin *et al.*, 2015).  
235 Furthermore, the plant hormone gibberellic acid (GA) antagonizes ABA signaling, in part, by  
236 stimulating degradation of PYR/PYL/RCARs and SnRK2s (Lin *et al.*, 2015). To determine  
237 whether SA affects protein turnover, we analyze the stability of purified recombinant PP2Cs and  
238 SnRK2s in a cell-free degradation assay. Following incubation in protein extracts prepared from  
239 Arabidopsis seedlings supplemented with ABA and/or SA, immunoblot analyses indicated that the  
240 levels of His6-tagged PP2C-D4, ABI1, and ABI2 decreased in extracts supplemented with 10  $\mu$ M  
241 ABA (Figure 4A). By contrast, the levels of these proteins remained fairly stable in extracts

242 supplemented with both ABA and SA. SA alone had little effect on ABI1 or ABI2 levels but a  
243 modest decrease of PP2C-D4 levels was detected (Figure 4A). Together, these results suggest that  
244 ABA enhances PP2C degradation, and that this heightened turnover is suppressed by SA.

245 The stability of three SnRK2s, SnRK2.2, SnRK2.3, and SnRK2.6, was then assessed using  
246 the cell-free protein degradation assay. The levels of all three recombinant SnRK2s were slightly  
247 greater in extracts supplemented with 10  $\mu$ M ABA as compared with unsupplemented extracts  
248 (Figure 4B). By contrast, SnRK2 levels were reduced in extracts containing both ABA and SA,  
249 with the greatest decrease detected after supplementation with ABA and 100  $\mu$ M SA. Thus, ABA  
250 appears to stabilize SnRK2s, while SA suppresses ABA's effect. Analysis of PYL1 did not reveal  
251 any change in protein levels regardless of supplementation with ABA and/or SA, suggesting that  
252 these hormones do not affect PYL1 stability (Supporting Figure 5).

253 The above results raised the possibility that endogenous SA antagonizes ABA signaling,  
254 at least in part, by stabilizing PP2Cs. To further assess this, the rate of ABI1 degradation was  
255 compared in protein extracts prepared from wild-type (WT) plants and the SA biosynthesis-  
256 deficient mutant *sid2-1*. ABI1 levels in the extract from *sid2-1* plants decreased substantially by  
257 30 min and were barely detectable after 1 hour, whereas those in the WT extract decreased  
258 gradually over time (Figure 4C). Surprisingly, the enhanced degradation observed in *sid2-1*  
259 extracts was not reversed by i) adding SA to the extract, ii) spraying SA on *sid2-1* plants, or iii)  
260 supplementing *sid2-1* growth media with SA (Supporting Figure 6). Thus, while these results  
261 suggest that SA stabilizes ABI1, the failure of exogenous SA to slow ABI1 degradation in *sid2-1*  
262 extracts suggests that another factor(s) might be involved in this process.

### 263 **SA antagonizes ABA-induced gene expression *in vivo***

264 Previous studies have demonstrated that exogenously supplied ABA induces the accumulation of  
265 *ABI1* and *ABI2* transcripts (Hoth et al., 2002). To determine whether SA antagonizes the  
266 expression of these ABA signaling components, transcript levels for *ABI1* and *ABI2*, as well as  
267 *PP2C-D4*, were monitored in ABA- and/or SA- treated Arabidopsis. Quantitative reverse  
268 transcriptase-PCR (qRT-PCR) analyses showed that transcripts for *ABI1* and *ABI2* accumulated  
269 after ABA, but not SA, treatment (Figure 5A). An intermediate level of transcripts was detected  
270 in plants treated with SA and ABA, suggesting that the ABA-induced expression of these genes

271 was partially suppressed by SA (Figure 5A). In comparison to the clade A PP2Cs, transcript  
272 accumulation for *PP2C-D4* was reduced in plants treated with either ABA or SA; an even greater  
273 reduction was observed in plants treated with both hormones. The expression of two well-known  
274 ABA-responsive genes, Response to Desiccation 29A (*RD29A*) and ABA-Responsive Element  
275 Binding Protein 2 (*AREB2*), also was analyzed. Consistent with previous studies, the expression  
276 of *RD29A* and *AREB2* was induced by ABA (Figure 5B) (Uno *et al.*, 2000; Nakashima *et al.*,  
277 2006). Importantly, plants treated with ABA and SA accumulated reduced levels of *RD29A* and  
278 *AREB2* transcripts, indicating that the ABA-induced expression of these genes is partially  
279 suppressed by SA. By contrast, SA alone did not affect the expression of either gene.

### 280 **An SA-deficient mutant is more sensitive to ABA-mediated seed dormancy**

281 In addition to (a)biotic stress responses, ABA is involved in growth and developmental processes,  
282 including maintaining seed dormancy to prevent untimely germination (Kermode, 2005; Hubbard  
283 *et al.*, 2010). To investigate whether SA antagonizes ABA's ability to suppress germination, we  
284 monitored Arabidopsis seed germination on plates containing Murashige and Skoog (MS) medium  
285 in the presence or absence of ABA and/or SA. In the presence of 1  $\mu$ M ABA, germination was  
286 dramatically reduced at all times monitored (Figure 6A). By contrast, 10  $\mu$ M SA reduced  
287 germination slightly at 36 hrs, but from 48 hrs onward, the germination percentage of SA-treated  
288 and control seeds was comparable. Plates containing both SA and ABA displayed an intermediate  
289 level of germination. Thus, SA appears to suppress ABA-mediated inhibition of germination.  
290 Whether endogenous SA levels also affect ABA-mediated suppression of germination was then  
291 tested by comparing the germination of WT and *sid2-1* seeds. The germination rate for *sid2-1*  
292 seeds grown on ABA-containing plates was consistently lower than that of comparably grown WT  
293 seeds; by 72 hours, 15% of the *sid2-1* seeds had germinated in the presence of 1  $\mu$ M ABA, in  
294 contrast to 40% of WT seeds (Figure 6B). While SA completely overcame ABA suppression of  
295 seed germination in WT at 96 hrs post plating, it only partially reversed ABA's effect in *sid2-1*.  
296 Based on the ABA hypersensitive phenotype displayed by *sid2-1* seeds, endogenous SA appears  
297 to play an important role in antagonizing ABA-mediated suppression of seed germination *in*  
298 *planta*.

299

## 300 Discussion

301 Elucidating the crosstalk between biotic and abiotic stress signaling pathways in plants is a rapidly  
302 expanding area of research. There is a growing recognition that ABA not only regulates abiotic  
303 stress responses and developmental processes, but also impacts plant-pathogen interactions  
304 (Robert-Seilaniantz *et al.*, 2011; Denance *et al.*, 2013). Likewise, SA not only signals plant  
305 immunity (Vlot *et al.*, 2009; Manohar *et al.*, 2015; Klessig *et al.*, 2016), but also regulates  
306 responses to abiotic stresses and various aspects of growth and development (Hayat *et al.*, 2010;  
307 Khan *et al.*, 2015). To gain insights into how SA exerts its myriad effects, we previously developed  
308 several high throughput screens for identifying SABPs (Tian *et al.*, 2012; Choi *et al.*, 2015;  
309 Manohar *et al.*, 2015). Here we report that several PP2Cs, including PP2C-D4, a member of clade  
310 D, and ABI1 and ABI2, members of clade A, are novel SABPs. By contrast, SA binding was not  
311 detected for two other phosphatases, HAB1 or PP2A, or for other components of the ABA  
312 signaling pathway, including various PYR/PYL/RCARs and SnRK2s. SPR analysis also revealed  
313 that binding of PP2C-D4, ABI1 and ABI2 to the SA analog 3AESA was enhanced in the presence  
314 of ABA. This finding suggests that PP2Cs from both clade A and D bind both ABA and SA, and  
315 that they do so in a cooperative manner. Although a previous report failed to detect binding  
316 between ABI1 and ABA (Ma *et al.*, 2009), this discrepancy may be due to the very high sensitivity  
317 of SPR. Indeed, Ma *et al.* (2009) noted that ABI1 phosphatase activity was reduced up to 20% in  
318 presence of ABA.

319 Since clade A PP2Cs are critical negative regulators of ABA signaling, the discovery that  
320 they bind SA suggested that they play a role in modulating SA/ABA crosstalk. Several studies  
321 have documented an antagonistic relationship between SA and the ABA signaling pathway. For  
322 example, SA suppressed ABA-mediated inhibition of shoot growth and expression of cell cycle-  
323 related genes in rice (Meguro & Sato, 2014). Likewise, pretreating Arabidopsis with a compound  
324 that activates SA-dependent defense signaling antagonized the induction of ABA biosynthesis-  
325 related and ABA-responsive genes after NaCl treatment (Yasuda *et al.*, 2008). Expanding on these  
326 findings, we demonstrated that SA treatment suppresses ABA-induced expression of the ABA  
327 signaling components *ABI1* and *ABI2* and the ABA-responsive genes *RD29A* and *AREB2*. In  
328 addition, SA antagonized ABA's ability to suppress seed germination. The combined observations  
329 that i) SA-deficient *sid2-1* seeds germinated more slowly than WT seeds, and ii) *sid2-1* seeds were

330 hypersensitive to exogenously supplied ABA, argue that endogenous SA plays an important role  
331 in counteracting the effects of both endogenously and exogenously supplied ABA.

332 To investigate the mechanism through which SA antagonizes ABA signaling, we  
333 monitored the interaction between several ABA receptors and PP2Cs. SPR analyses revealed that  
334 the clade A PP2Cs, ABI1 and ABI2, bind PYL1, PYL2, and PYR1 even in the absence of ABA  
335 (Figure 7A); however, these interactions were strongly enhanced in the presence of ABA (Figure  
336 7B). Strikingly, SA suppressed the ABA-enhanced interaction between these proteins, albeit to  
337 varying extents depending on the identity of the interacting partners (Figure 7C). Consistent with  
338 these results, both *in vitro* and *in vivo* analyses have previously demonstrated that ABA strongly  
339 enhances binding between clade A PP2Cs and certain ABA receptors, including PYL1, PYL2 and  
340 PYR1 (Park *et al.*, 2009). Crystal structure analyses further demonstrated that this interaction  
341 inhibits PP2C activity by occluding PP2C's active site (Melcher *et al.*, 2009; Miyazono *et al.*,  
342 2009). Since PP2Cs repress ABA signaling by preventing autophosphorylation-dependent  
343 activation of SnRK2s (Umezawa *et al.*, 2009; Soon *et al.*, 2012), ABA-induced binding of PP2Cs  
344 by ABA receptors is a critical step in activating ABA signaling (Fujii *et al.*, 2009). SA's ability to  
345 suppress the interaction between ABI1 or ABI2 and the ABA receptors therefore provides one  
346 mechanism through which SA can antagonize ABA signaling. In addition, our cell-free  
347 degradation assay revealed that SA suppresses the ABA-enhanced turnover of PP2Cs and  
348 stabilization of SnRK2s. Given that ABI1 was degraded substantially more rapidly in extracts from  
349 *sid2-1* mutants than from WT plants, endogenous SA appears to play an important role in  
350 regulating cellular PP2C levels. Taken together, these results suggest that SA antagonizes ABA  
351 signaling via multiple mechanisms that both promote the enzymatic activity and/or protein stability  
352 of negative regulators and decrease the stability of downstream effectors.

353 Within this overall framework, differences among the binding specificities and affinities,  
354 protein-protein interactions and/or stability of various ABA signaling components may further  
355 influence SA/ABA crosstalk. For example, while ABI1 and ABI2 bound SA, another clade A  
356 member, HAB1 did not. ABI1 differs from ABI2 as it displayed substantially greater affinity for  
357 all three ABA receptors in the absence of ABA; it also was the most stable PP2C in our *in vitro*  
358 degradation assay. SA's ability to disrupt the ABA-enhanced interactions between ABA receptors  
359 and PP2Cs also varied, depending on the proteins involved. In particular, the interaction between

360 PYR1 and ABI1 or ABI2 was suppressed less effectively by SA than the interactions between  
361 these PP2Cs and the other ABA receptors. Similar to these findings, reconstitution of the ABA  
362 signaling pathway in Arabidopsis protoplasts using different combinations of ABA receptors,  
363 PP2Cs and SnRK2s previously revealed that the intensity of interactions varied significantly  
364 depending on which members of the protein families were involved (Fujii *et al.*, 2009). Combined  
365 with our findings, these results suggest that while the various the members of the PP2C, ABA  
366 receptor and SnRK2 families serve overlapping functions, differences in their temporal and/or  
367 spatial expression patterns, as well as their affinity for specific interacting partners and/or SA and  
368 ABA, could fine-tune ABA signaling and regulate crosstalk with the SA pathway.

369 In comparison to the clade A PP2Cs, members of clade D were recently shown to  
370 negatively regulate cell expansion by dephosphorylating, and thereby inactivating plasma  
371 membrane H<sup>+</sup>-ATPases (Spartz *et al.*, 2014). In the presence of auxin, this suppression is relieved  
372 by members of the SAUR (small auxin up-regulated) protein family, which bind and inhibit PP2C-  
373 Ds. Interestingly, while different SAURs inhibited the activity of several PP2C-D family members  
374 (including PP2C-D4) to varying extents, they did not inhibit the activity of a clade A PP2Cs, ABI1,  
375 a clade E member, or a phosphatase belonging to the PPP family. Our studies provide additional  
376 insights into PP2C-D function, as we demonstrate that PP2C-D4 is an SABP, whose binding to  
377 3AESA is enhanced by ABA. PP2C-D4 also bound several ABA receptors, and this interaction  
378 was enhanced by the presence of ABA. In comparison to the clade A PP2C-ABA receptor  
379 interactions, however, the binding between PP2C-D4 and the ABA receptors was substantially  
380 weaker and its suppression by SA was less effective. In addition, SA consistently stimulated this  
381 interaction in the absence of ABA. The expression pattern of *PP2C-D4* in the presence of ABA  
382 and/or SA also differed significantly from that of the clade A PP2Cs. Thus, while PP2C-D4 and  
383 the clade A PP2Cs share some common features, their many differences are consistent with the  
384 previous demonstration that clade D and clade A PP2Cs serve distinct functions.

385 In response to stress, plants maximize their chances of survival and reproduction by  
386 redistributing cellular resources from growth and developmental processes to defensive responses  
387 (Asselbergh *et al.*, 2008; Atkinson & Urwin, 2012). Many studies have assessed plant responses  
388 to individual stresses, but there is a growing recognition that plants in the field contend with  
389 multiple stresses simultaneously, and that, depending on the specific stresses, the responses may

390 be additive or antagonistic. Thus, the hormones responsible for mediating developmental processes  
391 and stress responses are involved in complex crosstalk that ultimately allows the plant to tailor its  
392 response to the environmental conditions. A previous study demonstrated that ABA can interfere  
393 with SA-mediated innate immune responses by down-regulating SA biosynthesis (De Torres  
394 Zabala *et al.*, 2009). By contrast, our results provide a novel mechanism through which SA can  
395 antagonize ABA by interfering with multiple aspects of the ABA signaling pathway. The  
396 discovery that PP2C-D4 binds SA and several ABA receptors, and that this binding is enhanced  
397 in the presence of ABA, suggests an additional mechanism through which SA and ABA can  
398 negatively regulate auxin-mediated growth and developmental processes. Indeed, ABA was shown  
399 to suppress hypocotyl elongation, and this correlated with dephosphorylation of H<sup>+</sup>-ATPases  
400 (Hayashi *et al.*, 2014). These ABA-induced responses were suppressed in the *abil-1* mutant,  
401 suggesting that clade A PP2Cs are involved in auxin-mediated physiological processes. Future  
402 studies will be required to determine whether PP2C-D4 and/or other clade D PP2Cs also mediate  
403 ABA antagonism of cell expansion, and whether SA binding by PP2C-D4 affects its ability to  
404 interact with SAURs and thereby impact auxin signaling.

405 In summary, we have elucidated SA mechanisms of action in negatively regulating ABA  
406 signaling, which likely serves to properly balance the plant response to multiple stresses. As plants  
407 confront a changing climate, this balance and our understanding of how it is regulated and might  
408 be beneficially altered, take on increase significance.

409

410

411

412

413

414

415

416

## 417 **Materials and Methods**

### 418 **Plant materials and growth conditions**

419 The wild-type and *sid2-1 Arabidopsis thaliana* ecotype Col-0 plants were grown on standard  
420 Murashige and Skoog (MS) media containing half-strength of MS with pH adjusted to 6.0 by KOH  
421 and supplemented with 10 g /L sucrose. Arabidopsis seeds were first surface-sterilized by soaking  
422 in a solution of 30% bleach with 0.1% triton X-100 for 5-10 min and then rinsed five times with  
423 sterile water. The surface sterilized seeds were incubated at 4 °C for 2 days for stratification before  
424 planting on the MS media. For the seed germination assay, ( $\pm$ ) abscisic acid (Caisson labs) or  
425 salicylic acid (Sigma) were added directly into the MS media. The plates with seed were placed  
426 vertically in the growth chamber with 16/8h light/dark cycle, 22 °C, and 70% humidity. The  
427 germination rate was measured. For spray treatment, one-week old seedlings were subjected to  
428 water, ABA, SA, or ABA+SA spray treatment and whole seedlings were collected for RNA  
429 analysis. For cell-free degradation assay, ten-day-old wild-type or *sid2-1* seedlings were subjected  
430 to water, ABA, SA, or ABA+SA spray treatment to compare the effects of protein extracts on the  
431 stability of ABI1.

### 432 **Cloning and plasmid constructs**

433 All oligonucleotides used for cloning and plasmid construction are listed in Table S1. ORFs of  
434 PP2CD, ABI1, ABI2, and HAB1 were amplified from an Arabidopsis cDNA library. The resulting  
435 PCR products were digested with *NdeI* and *BamHI* for ABI1, *NdeI* and *SacI* for ABI2, and HAB1  
436 and cloned into the expression vector pET28a (EMD Millipore, MA, USA) for expression. PP2CD  
437 was cloned into pET42a (EMD Millipore, MA, USA) using *NdeI* and *XhoI* cloning sites. Cloning  
438 of PYL1, PYL2, PYR1, SnRK2.2, SnRK2.3, and SnRK2.6 into pSUMO- H6SUMO vector were  
439 described previously (Soon *et al.*, 2012).

### 440 **Protein purifications**

441 Two-step protein purifications were performed as described previously (Manohar *et al.*, 2017).  
442 Briefly, the Rosetta 2 (DE3) (EMD, Millipore, MA, USA) bacterial cells were grown at 37 °C in  
443 LB medium containing 50  $\mu$ g/ml kanamycin and 34  $\mu$ g/ml chloramphenicol until the OD<sub>600</sub> of the  
444 culture reached approximately 0.6 before addition of isopropyl- $\beta$ -D-thiogalactoside (IPTG) to a  
445 final concentration of 1 mM to induce expression. Induced culture was incubated overnight at 20



446 °C. The cells were then harvested by centrifugation and the pellet was resuspended in the lysis  
447 buffer (50 mM Tris pH 7.5, 500 mM NaCl, 10% glycerol, 20 mM imidazole, 0.5% triton X-100  
448 and 1 mM phenylmethylsulphonyl fluoride) and disrupted by sonication. The clarified supernatant  
449 obtained after centrifugation was incubated with Ni-NTA His resin (Novagen, MA, USA) and the  
450 bound protein was eluted in lysis buffer supplemented with 250 mM imidazole. The eluted proteins  
451 were then subjected to gel filtration chromatography on a HiLoad 16/600 Superdex 200 prep grade  
452 column (GE Healthcare, PA, USA), using gel filtration buffer (50 mM Tris pH 7.5, 150 mM NaCl,  
453 and 10% glycerol). The two-step purified proteins were stored at -80 °C.

#### 454 **Assessment of 3AESA-binding activities by Surface Plasmon Resonance (SPR)**

455 SPR analyses of 3AESA binding and competition by SA were performed with a Biacore 3000  
456 instrument (GE Healthcare) as described previously (Manohar *et al.*, 2015). Immobilization of  
457 3AESA on the CM5 sensor chip was performed as described previously (Tian *et al.*, 2012). To test  
458 SA-binding activity, proteins were diluted in HBS-EP buffer (GE Healthcare) and passed over the  
459 sensor surface of the 3AESA-immobilized and mock-coupled flow cells. The specific binding  
460 signal was determined by subtracting the signal generated with the mock-coupled flow cell from  
461 the signal generated by the 3AESA-immobilized cell. To re-use the sensor chips, bound proteins  
462 were stripped off by injecting NaOH solution (pH 12).

#### 463 **Assessment of protein-protein interactions by SPR**

464 Protein interaction analyses were performed by SPR using Biacore 3000 instrument. His-SUMO-  
465 tagged PYL1, PYL2, and PYR1 were immobilized on a CM5 sensor chip by amine coupling (GE  
466 healthcare), essentially by following the manufacturer's instructions. Briefly, proteins were diluted  
467 in 10 mM sodium acetate, pH 5.0 buffer at a concentration of to 50µg/ml. CM5 sensor chip surface  
468 was activated by injecting 85 µl of EDC/NHS solution with a flow rate of 10 µl/min. After  
469 activation, protein solution was injected for 42 minutes with a flow rate of 10 µl/min. Finally, 85  
470 µl of ethanolamine was flowed over the surface to deactivate remaining active groups and remove  
471 non-covalently bound protein with a flow rate of 10 µl/min. The protein immobilization level was  
472 stabilized for 12 hours by flowing HBS-EP buffer with a flow rate of 10 µl/min. To test protein-  
473 protein interactions, protein analytes (PP2Cs and SnRK2s) were diluted to desirable concentration  
474 in HBS-EP buffer in the presence or absence of various concentrations of ABA, SA, or ABA+SA,  
475 and then passed over the protein-immobilized sensor surface and mock coupled flow cells with a

476 flow rate of 30  $\mu$ l/min. The higher flow rate was used to avoid mass-transfer as recommended by  
477 the manufacturer. The binding signal was generated by subtracting the signal for mock-coupled  
478 flow cells from that for the protein-immobilized flow cells. To re-use the chip, bound proteins  
479 were stripped off by injecting 8  $\mu$ l of 10 mM glycine-HCl solution (pH 3) with a flow rate of 30  
480  $\mu$ l/min.

#### 481 **RNA analyses**

482 Unless stated otherwise, at least three biological replicates were used for all RNA analyses. For  
483 each replicate, total RNA from one-week old Arabidopsis seedlings was isolated from a pool of  
484 five seedlings. Total RNA was isolated from using Qiagen RNeasy plant mini kit (Qiagen)  
485 according to the manufacturer instructions. DNase treatment was done using DNA-free kit  
486 (Ambion) following the manufacturer's instructions. First strand cDNA was synthesized from 1  
487 mg of RNA using M-MLV reverse transcriptase (Promega). For quantitative real-time PCR,  
488 transcripts were amplified using SYBR premix Ex Taq II (Takara) with gene-specific primers  
489 listed in table S1. Reactions were done using a CFX96 touch Biorad Real-time PCR system (Bio-  
490 Rad). The PCR conditions were 95  $^{\circ}$ C for 3 min (initial denaturation) followed by 44 cycles of  
491 amplifications (95  $^{\circ}$ C for 10s, 60  $^{\circ}$ C for 30s), followed by generation of a dissociation curve. The  
492 relative fold change was calculated according to the  $2^{-\Delta\Delta C_t}$  method (Manosalva *et al.*, 2015).  
493 Ubiquitin was used as endogenous reference gene. The paired t-test with an  $\alpha$ -level of 0.05 was  
494 used to compare transcript level in the ABA, SA, ABA+SA, and mock-treated plant samples.

#### 495 **Cell-free degradation assay**

496 The tissue samples were collected from 10 day old seedlings of wild-type and *sid2-1* and finely  
497 grounded using liquid nitrogen. The total protein extracts were then prepared using protein  
498 extraction buffer (25 mM Tris pH 7.5, 10 mM NaCl, 10 mM MgCl<sub>2</sub>, and 4 mM PMSF). The  
499 sample was vortexed to mix and centrifuged twice at 17,000 g for 10 min at 4  $^{\circ}$ C to remove debris.  
500 The clear supernatant was pre-treated with 1 mM cycloheximide (MP Biomedicals) for 1 h to  
501 inhibit *de novo* protein biosynthesis. The extracts were then adjusted to equal protein  
502 concentrations in degradation buffer (25 mM Tris pH 7.5, 10 mM NaCl, 10 mM MgCl<sub>2</sub>, and 4  
503 mM PMSF, 5 mM DTT, and 10 mM ATP). For degradation assay, an equal amount (approximatly  
504 500 ng) of purified PP2Cs, SnRK2s, and PYL1 were incubated in 50  $\mu$ l of Arabidopsis total protein  
505 extract (containing approximatly 100  $\mu$ g total proteins) at 28  $^{\circ}$ C for 3 h, unless otherwise indicated.

506 For ABI1 and SnRK2.6 twice as much total protein extract (approximately 200  $\mu$ g) was used to  
507 more clearly visualize the effect of SA (Figure 4A, 4B). Immunoblot analyses were performed to  
508 detect protein levels by using an  $\alpha$ -His<sub>6</sub>-HRP polyclonal antibody (QED Biosciences).

509

510

511

512

513

514

515

516

517

518

519

520

521

522

523

524

525

526

527

528

529 **References**

- 530 **Asselbergh B, Achuo AE, Höfte M, Van Gijsegem F. 2008.** Abscisic acid deficiency leads to  
531 rapid activation of tomato defence responses upon infection with *Erwinia chrysanthemi*.  
532 *Molecular Plant Pathology* **9**: 11–24.
- 533 **Atkinson NJ, Urwin PE. 2012.** The interaction of plant biotic and abiotic stresses: From genes  
534 to the field. *Journal of Experimental Botany* **63**: 3523–3544.
- 535 **Audenaert K, De Meyer GB, Höfte MM. 2002.** Abscisic acid determines basal susceptibility of  
536 tomato to *Botrytis cinerea* and suppresses salicylic acid-dependent signaling mechanisms. *Plant*  
537 *Physiology* **128**: 491–501.
- 538 **Choi HW, Tian M, Song F, Venereau E, Preti A, Park S-W, Hamilton K, Swapna GVT,**  
539 **Manohar M, Moreau M, et al. 2015.** Aspirin's Active Metabolite Salicylic Acid Targets High  
540 Mobility Group Box 1 to Modulate Inflammatory Responses. *Molecular medicine (Cambridge,*  
541 *Mass.)* **21**: 526–35.
- 542 **Cottier S, Monig T, Wang Z, Svoboda J, Boland W, Kaiser M, Kombrink E. 2011.** The  
543 yeast three-hybrid system as an experimental platform to identify proteins interacting with small  
544 signaling molecules in plant cells: Potential and limitations. *Frontiers in Plant Science* **2**: 1–12.
- 545 **Denance N, Sanchez-Vallet A, Goffner D, Molina A. 2013.** Disease resistance or growth: the  
546 role of plant hormones in balancing immune responses and fitness costs. *Frontiers in Plant*  
547 *Science* **4**: 155.
- 548 **Fu ZQ, Yan S, Saleh A, Wang W, Ruble J, Oka N, Mohan R, Spoel SH, Tada Y, Zheng N,**  
549 **et al. 2012.** NPR3 and NPR4 are receptors for the immune signal salicylic acid in plants. *Nature*  
550 **486**: 228–32.
- 551 **Fuchs S, Grill E, Meskiene I, Schweighofer A. 2013.** Type 2C protein phosphatases in plants.  
552 *FEBS Journal* **280**: 681–693.
- 553 **Fujii H, Chinnusamy V, Rodrigues A, Rubio S, Antoni R, Park S, Cutler SR, Sheen J,**  
554 **Rodriguez PL, Zhu J. 2009.** In vitro reconstitution of an abscisic acid signalling pathway.  
555 *Nature* **462**: 660–4.

- 556 **Hauser F, Waadt R, Schroeder JI. 2011.** Evolution of abscisic acid synthesis and signaling  
557 mechanisms. *Current Biology* **21**: R346-R355.
- 558 **Hayashi Y, Takahashi K, Inoue SI, Kinoshita T. 2014.** Abscisic acid suppresses hypocotyl  
559 elongation by dephosphorylating plasma membrane H<sup>+</sup>-ATPase in *Arabidopsis thaliana*. *Plant*  
560 *and Cell Physiology* **55**: 845–853.
- 561 **Hayat Q, Hayat S, Irfan M, Ahmad A. 2010.** Effect of exogenous salicylic acid under  
562 changing environment: A review. *Environmental and Experimental Botany* **68**: 14–25.
- 563 **Hubbard KE, Nishimura N, Hitomi K, Getzoff ED, Schroeder JI. 2010.** Early abscisic acid  
564 signal transduction mechanisms : newly discovered components and newly emerging questions.  
565 **25**: 1695–1708.
- 566 **Irigoyen ML, Iniesto E, Rodriguez L, Puga MI, Yanagawa Y, Pick E, Strickland E, Paz-**  
567 **Ares J, Wei N, De Jaeger G, et al. 2014.** Targeted Degradation of Abscisic Acid Receptors Is  
568 Mediated by the Ubiquitin Ligase Substrate Adaptor DDA1 in *Arabidopsis*. *The Plant Cell* **26**:  
569 712–728.
- 570 **Kermode AR. 2005.** Role of abscisic acid in seed dormancy. *Journal of Plant Growth*  
571 *Regulation* **24**: 319–344.
- 572 **Khan MIR, Fatma M, Per TS, Anjum N, Khan N. 2015.** Salicylic acid-induced abiotic stress  
573 tolerance and underlying mechanisms in plants. *Frontiers in plant science* **6**: 462.
- 574 **Klessig DF, Tian M, Choi HW. 2016.** Multiple targets of salicylic acid and its derivatives in  
575 plants and animals. *Frontiers in Immunology* **7**: 206.
- 576 **Kong L, Cheng J, Zhu Y, Ding Y, Meng J, Chen Z, Xie Q, Guo Y, Li J, Yang S, et al. 2015.**  
577 Degradation of the ABA co-receptor ABI1 by PUB12/13 U-box E3 ligases. *Nature*  
578 *communications* **6**: 8630.
- 579 **Lim CW, Luan S, Lee SC. 2014.** A prominent role for RCAR3-mediated ABA signaling in  
580 response to *Pseudomonas syringae* pv. *Tomato DC3000* infection in *Arabidopsis*. *Plant and Cell*  
581 *Physiology* **55**: 1691–1703.
- 582 **Lin Q, Wu F, Sheng P, Zhang Z, Zhang X, Guo X, Wang J, Cheng Z, Wang J, Wang H, et**

- 583 **al. 2015.** The SnRK2-APC/C(TE) regulatory module mediates the antagonistic action of  
584 gibberellic acid and abscisic acid pathways. *Nature Communications* **6**: 7981.
- 585 **Ma Y, Szostkiewicz I, Korte A, Moes D, Yang Y, Christmann A, Grill E. 2009.** Regulators of  
586 PP2C phosphatase activity function as abscisic acid sensors. *Science (New York, N.Y.)* **324**:  
587 1064–1068.
- 588 **Manohar M, Choi HW, Manosalva PM, Austin C, Peters J, Klessig DF. 2017.** Plant and  
589 human MORC proteins have DNA modifying activities similar to type II topoisomerases, but  
590 require additional factor(s) for full activity. *Mpmi* **30**: 87-100.
- 591 **Manohar M, Tian M, Moreau M, Park S-W, Choi HW, Fei Z, Friso G, Asif M, Manosalva**  
592 **P, von Dahl CC, et al. 2015.** Identification of multiple salicylic acid-binding proteins using two  
593 high throughput screens. *Frontiers in Plant Science* **5**: 1–14.
- 594 **Manosalva P, Manohar M, von Reuss SH, Chen S, Koch A, Kaplan F, Choe A, Micikas RJ,**  
595 **Wang X, Kogel K-H, et al. 2015.** Conserved nematode signalling molecules elicit plant  
596 defenses and pathogen resistance. *Nature Communications* **6**: 7795.
- 597 **McDonald KL, Cahill DM. 1999.** Influence of abscisic acid and the abscisic acid biosynthesis  
598 inhibitor, norflurazon, on interactions between *Phytophthora sojae* and soybean (*Glycine max*).  
599 *European Journal of Plant Pathology* **105**: 651–658.
- 600 **Meguro A, Sato Y. 2014.** Salicylic acid antagonizes abscisic acid inhibition of shoot growth and  
601 cell cycle progression in rice. *Scientific reports* **4**: 4555.
- 602 **Melcher K, Ng L-M, Zhou XE, Soon F-F, Xu Y, Suino-Powell KM, Park S-Y, Weiner JJ,**  
603 **Fujii H, Chinnusamy V, et al. 2009.** A gate-latch-lock mechanism for hormone signalling by  
604 abscisic acid receptors. *Nature* **462**: 602–8.
- 605 **Meskiene I, Baudouin E, Schweighofer A, Liwosz A, Jonak C, Rodriguez PL, Jelinek H,**  
606 **Hirt H. 2003.** Stress-induced protein phosphatase 2C is a negative regulator of a mitogen-  
607 activated protein kinase. *Journal of Biological Chemistry* **278**: 18945–18952.
- 608 **Miyazono K-I, Miyakawa T, Sawano Y, Kubota K, Kang H-J, Asano A, Miyauchi Y,**  
609 **Takahashi M, Zhi Y, Fujita Y, et al. 2009.** Structural basis of abscisic acid signalling. *Nature*  
610 **462**: 609–14.

- 611 **Mohr PG, Cahill DM. 2003.** Abscisic acid influences the susceptibility of *Arabidopsis thaliana*  
612 to *Pseudomonas syringae* pv. tomato and *Peronospora parasitica*. *Functional Plant Biology* **30**:  
613 461–469.
- 614 **Nakashima K, Fujita Y, Katsura K, Maruyama K, Narusaka Y, Seki M, Shinozaki K,**  
615 **Yamaguchi-Shinozaki K. 2006.** Transcriptional regulation of ABI3- and ABA-responsive genes  
616 including RD29B and RD29A in seeds, germinating embryos, and seedlings of *Arabidopsis*.  
617 *Plant Molecular Biology* **60**: 51–68.
- 618 **Park S-Y, Fung P, Nishimura N, Jensen DR, Fujii H, Zhao Y, Lumba S, Santiago J,**  
619 **Rodrigues A, Chow T-FF, et al. 2009.** Abscisic acid inhibits type 2C protein phosphatases via  
620 the PYR/PYL family of START proteins. *Science (New York, N.Y.)* **324**: 1068–1071.
- 621 **Raghavendra AS, Gonugunta VK, Christmann A, Grill E. 2010.** ABA perception and  
622 signalling. *Trends in Plant Science* **15**: 395–401.
- 623 **Robert-Seilaniantz A, Grant M, Jones JDG. 2011.** Hormone Crosstalk in Plant Disease and  
624 Defense: More Than Just JASMONATE-SALICYLATE Antagonism. *Annual Review of*  
625 *Phytopathology* **49**: 317–343.
- 626 **Sanchez-Vallet a., Lopez G, Ramos B, Delgado-Cerezo M, Riviere M-P, Liorente F,**  
627 **Fernandez P V, Miedes E, Estevez JM, Grant M, et al. 2012.** Disruption of abscisic acid  
628 signalling constitutively activates *Arabidopsis* resistance to the necrotrophic fungus  
629 *Plectosphaerella cucumerina*. *Plant Physiology* **160**: 2109–2124.
- 630 **Santiago J, Dupeux F, Betz K, Antoni R, Gonzalez-Guzman M, Rodriguez L, Márquez JA,**  
631 **Rodriguez PL. 2012.** Structural insights into PYR/PYL/RCAR ABA receptors and PP2Cs.  
632 *Plant Science* **182**: 3–11.
- 633 **Santiago J, Dupeux F, Round A, Antoni R, Park S-Y, Jamin M, Cutler SR, Rodriguez PL,**  
634 **Márquez JA. 2009.** The abscisic acid receptor PYR1 in complex with abscisic acid. *Nature* **462**:  
635 665–8.
- 636 **Schweighofer A, Hirt H, Meskiene I. 2004.** Plant PP2C phosphatases: Emerging functions in  
637 stress signaling. *Trends in Plant Science* **9**: 236–243.
- 638 **Singh A, Pandey A, Srivastava AK, Tran L-SP, Pandey GK. 2015.** Plant protein

- 639 phosphatases 2C: from genomic diversity to functional multiplicity and importance in stress  
640 management. *Critical Reviews in Biotechnology* **8551**: 1–13.
- 641 **Song SK, Clark SE. 2005.** POL and related phosphatases are dosage-sensitive regulators of  
642 meristem and organ development in Arabidopsis. *Developmental Biology* **285**: 272–284.
- 643 **Soon F-F, Ng L-M, Zhou XE, West GM, Kovach A, Tan MHE, Suino-Powell KM, He Y,**  
644 **Xu Y, Chalmers MJ, et al. 2012.** Molecular mimicry regulates ABA signaling by SnRK2  
645 kinases and PP2C phosphatases. *Science (New York, N.Y.)* **335**: 85–8.
- 646 **Spartz AK, Ren H, Park MY, Grandt KN, Lee SH, Murphy AS, Sussman MR, Overvoorde**  
647 **PJ, Gray WM. 2014.** SAUR Inhibition of PP2C-D Phosphatases Activates Plasma Membrane  
648 H<sup>+</sup>-ATPases to Promote Cell Expansion in Arabidopsis. *The Plant cell* **26**: 2129–2142.
- 649 **Thaler JS, Bostock RM. 2004.** Interactions between abscisic-acid-mediated responses and plant  
650 resistance to pathogens and insects. *Ecology* **85**: 48–58.
- 651 **Tian M, Caroline CVD, Liu PP, Friso G, Van Wijk KJ, Klessig DF. 2012.** The combined use  
652 of photoaffinity labeling and surface plasmon resonance-based technology identifies multiple  
653 salicylic acid-binding proteins. *Plant Journal* **72**: 1027–1038.
- 654 **de Torres-Zabala M, Truman W, Bennett MH, Lafforgue G, Mansfield JW, Rodriguez**  
655 **Egea P, Bögre L, Grant M. 2007.** Pseudomonas syringae pv. tomato hijacks the Arabidopsis  
656 abscisic acid signalling pathway to cause disease. *The EMBO Journal* **26**: 1434–1443.
- 657 **De Torres Zabala M, Bennett MH, Truman WH, Grant MR. 2009.** Antagonism between  
658 salicylic and abscisic acid reflects early host-pathogen conflict and moulds plant defence  
659 responses. *Plant Journal* **59**: 375–386.
- 660 **Tuteja N. 2007.** Abscisic Acid and abiotic stress signaling. *Plant Signaling & Behavior* **2**: 135–  
661 8.
- 662 **Umezawa T, Sugiyama N, Mizoguchi M, Hayashi S, Myouga F, Yamaguchi-Shinozaki K,**  
663 **Ishihama Y, Hirayama T, Shinozaki K. 2009.** Type 2C protein phosphatases directly regulate  
664 abscisic acid-activated protein kinases in Arabidopsis. *Proceedings of the National Academy of*  
665 *Sciences of the United States of America* **106**: 17588–17593.



- 666 **Uno Y, Furihata T, Abe H, Yoshida R, Shinozaki K, Yamaguchi-Shinozaki K. 2000.**  
667 Arabidopsis basic leucine zipper transcription factors involved in an abscisic acid-dependent  
668 signal transduction pathway under drought and high-salinity conditions. *Proceedings of the*  
669 *National Academy of Sciences of the United States of America* **97**: 11632–11637.
- 670 **Vierstra RD. 2009.** The ubiquitin-26S proteasome system at the nexus of plant biology. *Nature*  
671 *reviews. Molecular Cell Biology* **10**: 385–97.
- 672 **Vlot AC, Dempsey DA, Klessig DF. 2009.** Salicylic Acid, a Multifaceted Hormone to Combat  
673 Disease. *Annual Review of Phytopathology* **47**: 177–206.
- 674 **Ward EWB, Cahill DM, Bhattacharyya MK. 1989.** Abscisic Acid Suppression of  
675 Phenylalanine Ammonia-Lyase Activity and mRNA, and Resistance of Soybeans to  
676 *Phytophthora megasperma* f.sp. *glycinea*. *Plant Physiology* **91**: 23–27.
- 677 **Widjaja I, Lassowskat I, Bethke G, Eschen-Lippold L, Long HH, Naumann K, Dangl JL,**  
678 **Scheel D, Lee J. 2010.** A protein phosphatase 2C, responsive to the bacterial effector AvrRpm1  
679 but not to the AvrB effector, regulates defense responses in Arabidopsis. *Plant Journal* **61**: 249–  
680 258.
- 681 **Wu Y, Zhang D, Chu JY, Boyle P, Wang Y, Brindle ID, De Luca V, Després C. 2012.** The  
682 Arabidopsis NPR1 Protein Is a Receptor for the Plant Defense Hormone Salicylic Acid. *Cell*  
683 *Reports* **1**: 639–647.
- 684 **Yasuda M, Ishikawa A, Jikumaru Y, Seki M, Umezawa T, Asami T, Maruyama-Nakashita**  
685 **A, Kudo T, Shinozaki K, Yoshida S, et al. 2008.** Antagonistic Interaction between Systemic  
686 Acquired Resistance and the Abscisic Acid-Mediated Abiotic Stress Response in Arabidopsis.  
687 *The Plant Cell* **20**: 1678–1692.
- 688
- 689
- 690
- 691
- 692

693 **Acknowledgement:**

694 We thank D'Maris Dempsey for editing and the US National Science Foundation for financial  
695 support via grant IOS-0820405 to D.F.K. We thank Prof. Karsten Melcher (Van Andel Research  
696 Institute), for the *E. coli* expression vectors corresponding to PYL1, PYL2, PYR1, SnRK2.2,  
697 SnRK2.3, and SnRK2.6.

698

699 **Authors' contributions:**

700 M.M, P.M, and D.F.K conceived the research. M.M, D.W, E. K, and D.F.K designed the research.  
701 M.M, D.W, P.M, and H.W.C performed the research. M.M, D.W, E.K, and D.F.K analyzed the  
702 data. M.M and D.F.K wrote the paper. All authors have read and approved the final manuscript.

703

704

705

706

## 707 **Figure Legends**

708 **Figure 1: Several PP2Cs bind SA.** (A, D, G) Sensorgrams for 1  $\mu$ M of His<sub>6</sub>-tagged PP2C-D4  
709 (At3g55050) (A), ABI1 (At4g26080) (D), and ABI2 (At5g57050) (G) in the absence (0 mM) or  
710 presence of two concentrations of SA (5 or 10 mM) using a 3AESA-immobilized SPR sensor chip.  
711 Signals detected from a mock-coupled control chip were subtracted. (B, E, H) Photo-activated  
712 crosslinking of 50 ng of PP2C-D4 (B), ABI1 (E), and ABI2 (H) to 4AzSA (50  $\mu$ M) in the absence  
713 or presence of increasing amounts of SA was detected by immunoblotting using an  $\alpha$ -SA antibody.  
714 Reactions without 4AzSA served as negative controls. Proteins stained with Coomassie Brilliant  
715 Blue (CBB) served as the loading controls. (C, F, I) Binding of [<sup>3</sup>H]SA (200 nM) by 200 ng/ $\mu$ l  
716 PP2C-D4 (C), ABI1 (F), and ABI2 (I) in the absence or presence of a 10,000-fold excess of  
717 unlabeled SA was determined by size-exclusion chromatography. Chromatography with [<sup>3</sup>H]SA  
718 in the absence of protein served as negative controls. Reactions with [<sup>3</sup>H]SA with excess of 4-  
719 amino benzoic acid (4-HBA), an inactive SA analog, served as negative controls for SA-specific  
720 competitive inhibition. The experiments was independently repeated at least twice.

721 **Figure 2: SA-binding activities of PP2Cs are enhanced by ABA and this binding is partially**  
722 **suppressed by SA.** (A-C) Sensorgrams obtained with recombinant, purified 1  $\mu$ M of His<sub>6</sub>-tagged  
723 PP2C-D4 (A), ABI1 (B), and ABI2 (C) using a 3AESA-immobilized sensor chip in the absence  
724 or in the presence of 2 mM ABA or 2 mM ABA plus 2.5 mM SA. Signals detected from a mock-  
725 coupled control chip were subtracted. The experiments was independently repeated at least twice.

726 **Figure 3: SA disrupts the ABA-induced interaction between PP2Cs and PYL1.** (A-C)  
727 Sensorgrams obtained with recombinant, purified 10  $\mu$ M of His<sub>6</sub>-tagged PP2C-D4 (A), 1  $\mu$ M of  
728 ABI1 (B) or 2.5  $\mu$ M of ABI2 (C) using a His<sub>6</sub>-SUMO tagged PYL1-immobilized sensor chip in  
729 the absence or presence of the indicated concentrations of ABA or SA. Signals detected from a  
730 mock-coupled control chip were subtracted. The experiments was independently repeated at least  
731 twice.

732 **Figure 4: SA alters ABA-mediated turnover of PP2Cs and SnRK2s.** (A) Cell-free degradation  
733 assay using total protein extracts prepared from ten-day-old Arabidopsis seedlings supplemented  
734 with 500 ng of His<sub>6</sub>-tagged PP2Cs (PP2C-D4, ABI1, and ABI2) and indicated concentrations of  
735 ABA, SA, or ABA+SA. (B) Cell-free degradation assay using total protein extracts prepared from

736 ten-day-old *Arabidopsis* seedlings supplemented with 500 ng of His<sub>6</sub>-Sumo-tagged SnRK2s  
737 (SnRK2.2, 2.3, and 2.6) and indicated concentrations of ABA or ABA+SA. For A & B, the  
738 degradation assay was carried out at 30° C for 3 hrs. All lanes shown are from the same experiment;  
739 some lanes unrelated to this study have been removed and lanes were then merged for clarity of  
740 presentation. (C) Cell-free degradation assay using total protein extracts prepared from ten-day-  
741 old wild-type or *sid2-1* *Arabidopsis* seedlings supplemented with 500 ng of His<sub>6</sub>-tagged ABI1.  
742 Samples were taken after 0, 0.5, 1, or 2 hrs of incubation; proteolysis was stopped by addition of  
743 SDS-PAGE buffer. Proteins were detected by immunoblotting using an  $\alpha$ -His<sub>6</sub>-HRP antibody.  
744 Staining with Coomassie brilliant blue (CBB) staining of the gel served as a loading control. The  
745 experiments was independently repeated at least twice.

746 **Figure 5: SA suppresses ABA-induced gene expression.** (A) Transcript levels, as measured by  
747 qRT-PCR in seedlings pretreated with either water, 100  $\mu$ M ABA, 100  $\mu$ M SA or 100  $\mu$ M ABA  
748 plus 100  $\mu$ M SA. Transcript levels of *PP2C-D4*, *ABII*, and *ABI2* were determined at 3 hrs post  
749 treatment (hpt). Data are averaged  $\pm$  s.d (n=3). (B) Transcript levels as measured by qRT-PCR of  
750 ABA-responsive marker genes in seedlings pretreated with either water, 100  $\mu$ M ABA, 100  $\mu$ M  
751 SA or 100  $\mu$ M ABA plus 100  $\mu$ M SA. Transcript levels of *RD29A* (RESPONSIVE TO  
752 DESICCATION 29A) and *AREB2* (ABRE BINDING FACTOR 2) were determined at 0, 3, 6, 12  
753 and 24 hpt. The relative expression levels were quantified by normalizing to ubiquitin expression  
754 level. Data are averaged  $\pm$  s.d (n=4). \*P  $\leq$  0.05; \*\*P  $\leq$  0.005; \*\*\*P  $\leq$  0.0005; \*\*\*\*P  $\leq$  0.00005;  
755 two-tailed *t*-test. The experiments was independently repeated at least twice.

756 **Figure 6: SA antagonizes ABA-mediated suppression of seed germination.** (A) Germination  
757 rate of *Arabidopsis* wild-type seeds on MS medium containing no hormone or in the presence of  
758 1  $\mu$ M ABA, 10  $\mu$ M SA or 1 $\mu$ M ABA plus 10  $\mu$ M SA. (B) Comparison of germination rate between  
759 wild-type and *sid2-1* on MS medium containing no hormone or in the presence of 1  $\mu$ M ABA or  
760 1 $\mu$ M ABA plus 10  $\mu$ M SA. The germination time course for wild-type seeds is shown with a solid  
761 line, while for *sid2-1* it is shown with a broken line (n=40 seeds). The percent of germinated seeds  
762 was determined at 36, 48, 60, 72, 84, 96, 108 and 120 hrs post plating. The experiments was  
763 independently repeated at least twice.

764

765 **Figure 7: Schematic illustrating part of SA's antagonistic effects on the ABA signaling**  
766 **module (A).** In the absence of ABA, free PP2Cs prevents autophosphorylation-dependent  
767 activation of SnRK2s by dephosphorylating them. **(B)** In the presence of ABA, PYR/PYL  
768 receptors tightly bind to PP2Cs, thereby preventing free PP2C-mediated dephosphorylation of  
769 SnRK2s. Receptor-mediated occlusion of PP2Cs allows autophosphorylated-activated SnRK2s to  
770 relay the ABA signaling by phosphorylating downstream targets such as abscisic acid responsive  
771 elements-binding factor 2 (ABF2), which enables its binding to ABA-responsive elements  
772 (ABRE) in the promoter region of ABA-responsive genes. **(C)** SA suppresses ABA's enhancement  
773 of the interaction of PP2Cs with the PYR/PYL/RCAR receptor and the resulting  
774 autophosphorylation-dependent activation of SnRK2s, which results in reduced ABA signaling.  
775 The length and thickness of the arrows indicate the equilibrium between free and receptor-bound  
776 PP2Cs and between inactive, nonphosphorylated and active, autophosphorylated SnRK2s.

777

778

779

780

781 **Supplementary Figures**

782 **Supplementary Figure 1: HAB1, PP2A and members of the PYR/PYL/RCAR and SnRK2**  
783 **families are not SABPs (A-C)** Sensorgrams obtained using a 3AESA-immobilized SPR sensor  
784 chip with 5  $\mu\text{M}$  of His<sub>6</sub>-HAB1 (At1g72770), His<sub>6</sub>-PP2A (At1g25490), or His<sub>6</sub>-SUMO-SnRK2.2  
785 (At3g50500) in the absence or presence of 2 mM ABA. Signals detected from a mock-coupled  
786 control chip were subtracted. **(D)** Binding of [<sup>3</sup>H]SA (200 nM) by 200 ng/ $\mu\text{l}$  SnRK2.2, 2.3, 2.6,  
787 PYL1, PYL2, or PYR1 was determined by size-exclusion chromatography. Chromatography with  
788 [<sup>3</sup>H]SA in the absence of protein served as negative control.

789 **Supplementary Figure 2: Effect of ABA on the interactions of PP2Cs with PYL1. (A, C, E)**  
790 Sensorgrams obtained with the indicated concentrations of recombinant, purified His<sub>6</sub>- tagged  
791 PP2C-D4, ABI1, or ABI2 using a His<sub>6</sub>- SUMO-tagged PYL1-immobilized sensor chip. **(B, D, F)**  
792 ABA dose-dependent effect on the interactions between 10  $\mu\text{M}$  PP2C-D4, 1  $\mu\text{M}$  ABI1, or 2.5  $\mu\text{M}$   
793 ABI2 and His<sub>6</sub>- SUMO-tagged PYL1 immobilized on the sensor chip. Signals detected from a  
794 mock-coupled control chip were subtracted. The experiments was independently repeated at least  
795 twice.

796 **Supplementary Figure 3: SA disrupts the ABA-enhanced interactions between PP2Cs**  
797 **(PP2C-D4, ABI1, and ABI2) and the ABA receptor PYL2. (A, D, G)** Sensorgrams obtained  
798 using a His<sub>6</sub>-SUMO-tagged PYL2-immobilized sensor chip and the indicated concentrations of  
799 recombinant, purified His<sub>6</sub>- tagged PP2C-D4, ABI1, or ABI2. **(B, E, H)** ABA dose-dependent  
800 effect on the interactions of 10  $\mu\text{M}$  PP2C-D4, 1  $\mu\text{M}$  ABI1, or 2.5  $\mu\text{M}$  ABI2 with His<sub>6</sub>-SUMO-  
801 tagged PYL2-immobilized sensor chip. **(C, F, I)** Sensorgrams obtained with 10  $\mu\text{M}$  of the His<sub>6</sub>-  
802 tagged PP2C-D4, 1  $\mu\text{M}$  ABI1, or 2.5  $\mu\text{M}$  ABI2 using a His<sub>6</sub>-SUMO-tagged PYL2-immobilized  
803 sensor chip in the absence or presence of the indicated concentrations of ABA, SA or ABA plus  
804 SA. Signals detected from a mock-coupled control chip were subtracted. The experiments was  
805 independently repeated at least twice.

806 **Supplementary Figure 4: SA disrupts the ABA-enhanced interactions between PP2Cs**  
807 **(PP2C-D4, ABI1, and ABI2) and ABA receptor PYR1. (A, D, G)** Sensorgrams obtained using  
808 a His<sub>6</sub>- SUMO-tagged PYR1-immobilized sensor chip and the indicated concentrations of  
809 recombinant, purified His<sub>6</sub>- tagged PP2C-D4, ABI1, or ABI2. **(B, E, H)** ABA dose-dependent  
810 effect on the interactions of 10  $\mu\text{M}$  PP2C-D4, 1  $\mu\text{M}$  ABI1, or 2.5  $\mu\text{M}$  ABI2 with His<sub>6</sub>-SUMO-

811 tagged PYR1-immobilized sensor chip. **(C, F, I)** Sensorgrams obtained with recombinant 10  $\mu$ M  
812 of the His<sub>6</sub>- tagged PP2C-D4, 1  $\mu$ M ABI1 or 2.5  $\mu$ M ABI2 using a His<sub>6</sub>- SUMO-tagged PYR1-  
813 immobilized sensor chip in the absence or presence of the indicated concentrations of ABA, SA,  
814 or ABA plus SA. Signals detected from a mock-coupled control chip were subtracted. The  
815 experiments was independently repeated at least twice.

816 **Supplementary Figure 5: ABA and SA alone or in combination do not affect turnover of**  
817 **PYL1.** Cell-free degradation assay using total protein extracts prepared from ten-day-old  
818 Arabidopsis seedlings supplemented with 500 ng of His<sub>6</sub>-Sumo-tagged PYL1 and indicated  
819 concentrations of ABA, SA, or ABA+SA. The degradation assay was carried out at 30<sup>0</sup> C for 3  
820 hrs. Proteins were detected by immunoblotting using an  $\alpha$ -His<sub>6</sub>-HRP antibody and Coomassie  
821 brilliant blue (CBB) staining of the gel served as a loading control. The experiments was  
822 independently repeated twice.

823 **Supplementary Figure 6: SA does not affect the rate of ABI1 degradation in *sid2-1* plants.**  
824 **(A)** Cell-free degradation assay using 500 ng of His<sub>6</sub>- tagged ABI1 and Arabidopsis protein  
825 extracts from Wt or *sid2-1* mutant plants in the absence or presence of 10  $\mu$ M SA that was added  
826 directly to the reaction mix. His<sub>6</sub>- tagged ABI1 was detected in samples harvested at the indicated  
827 times by immunoblotting using a  $\alpha$ -His<sub>6</sub>-HRP antibody. **(B)** Cell-free degradation assay using 500  
828 ng of His<sub>6</sub>-tagged ABI1 and Arabidopsis protein extracts from ten-day-old Wt or *sid2-1* mutant  
829 plants that were sprayed with water or 10  $\mu$ M SA three hours prior to extract preparation. His<sub>6</sub>-  
830 tagged ABI1 was detected in samples harvested at the indicated times by immunoblotting using a  
831  $\alpha$ -His<sub>6</sub>-HRP antibody. **(C)** Cell-free degradation assay using Arabidopsis protein extracts from  
832 ten-day-old wild-type (Wt) or SA-deficient *sid2-1* mutant plants grown in MS medium in the  
833 absence or presence of 10  $\mu$ M SA and supplemented with 500 ng of His<sub>6</sub>-tagged ABI1. His<sub>6</sub>-  
834 tagged ABI1 was detected in samples harvested at the indicated times by immunoblotting using  
835 an  $\alpha$ -His<sub>6</sub>-HRP antibody. For B & C, all lanes are from the same experiment; some lanes unrelated  
836 to this study were removed and lanes were then merged for clarity of presentation. The experiments  
837 was independently repeated twice.

838

839

**Figure 1**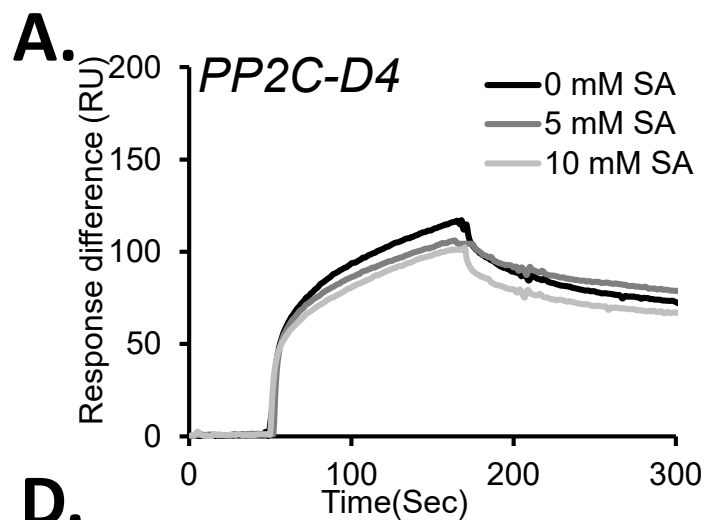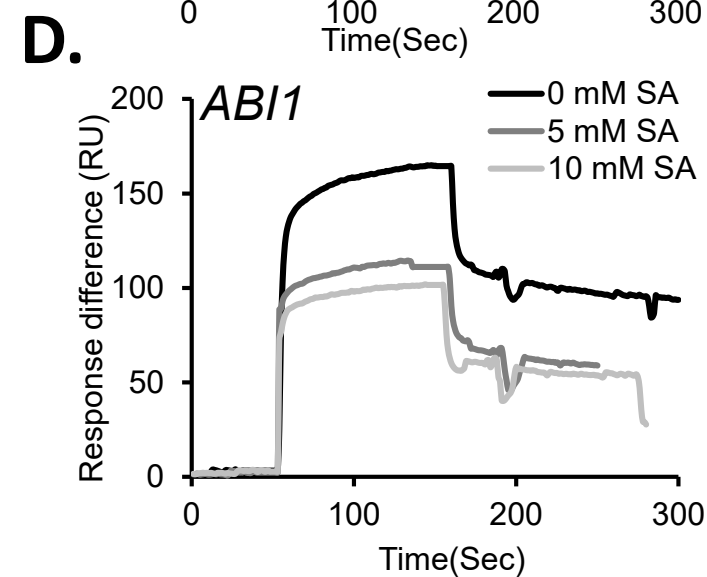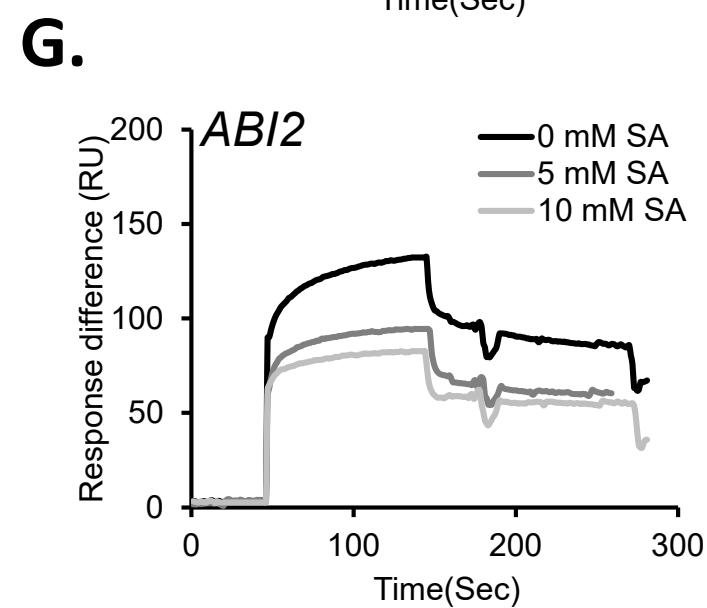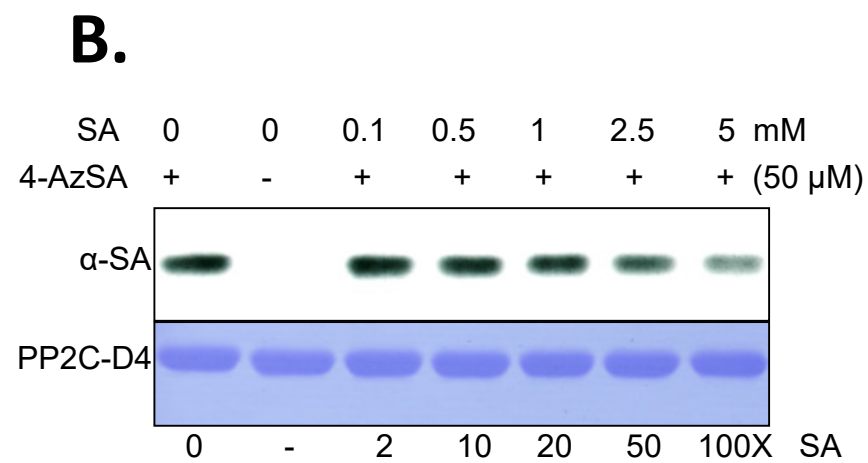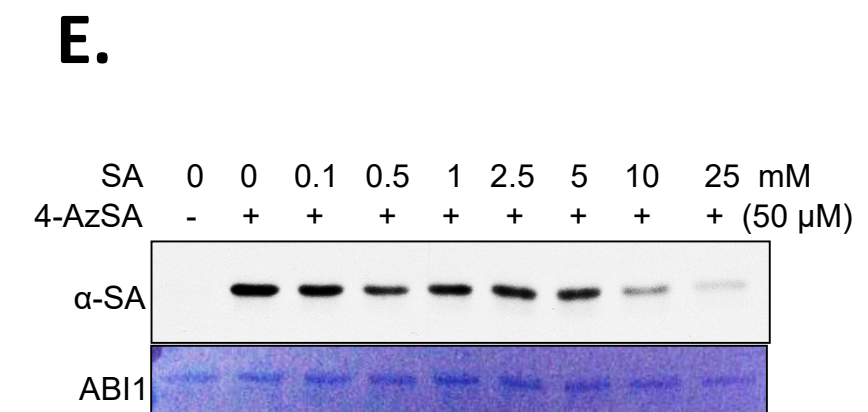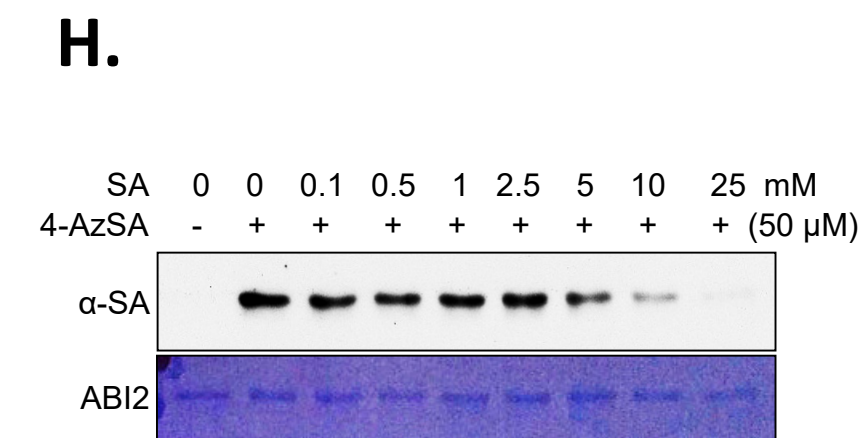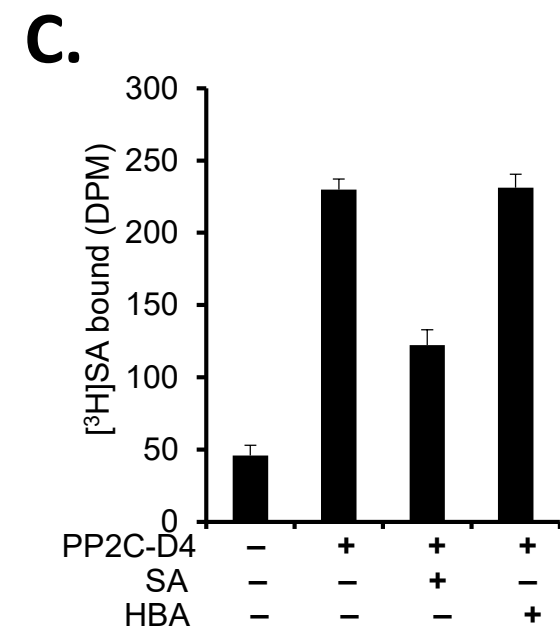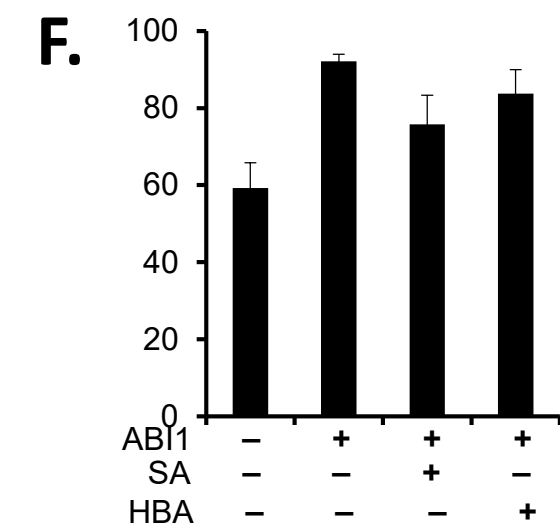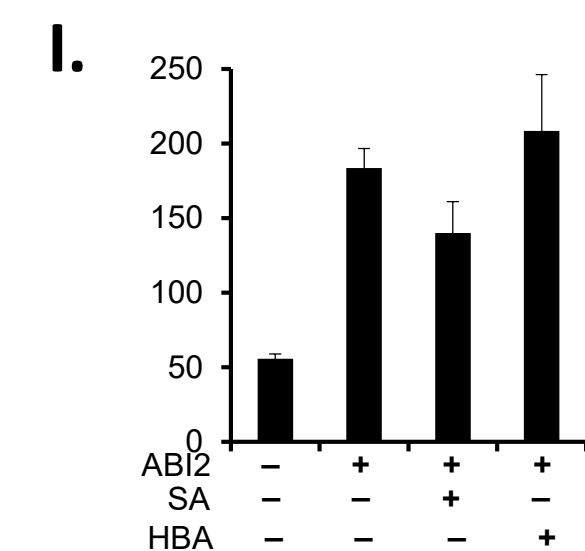



# Figure 2

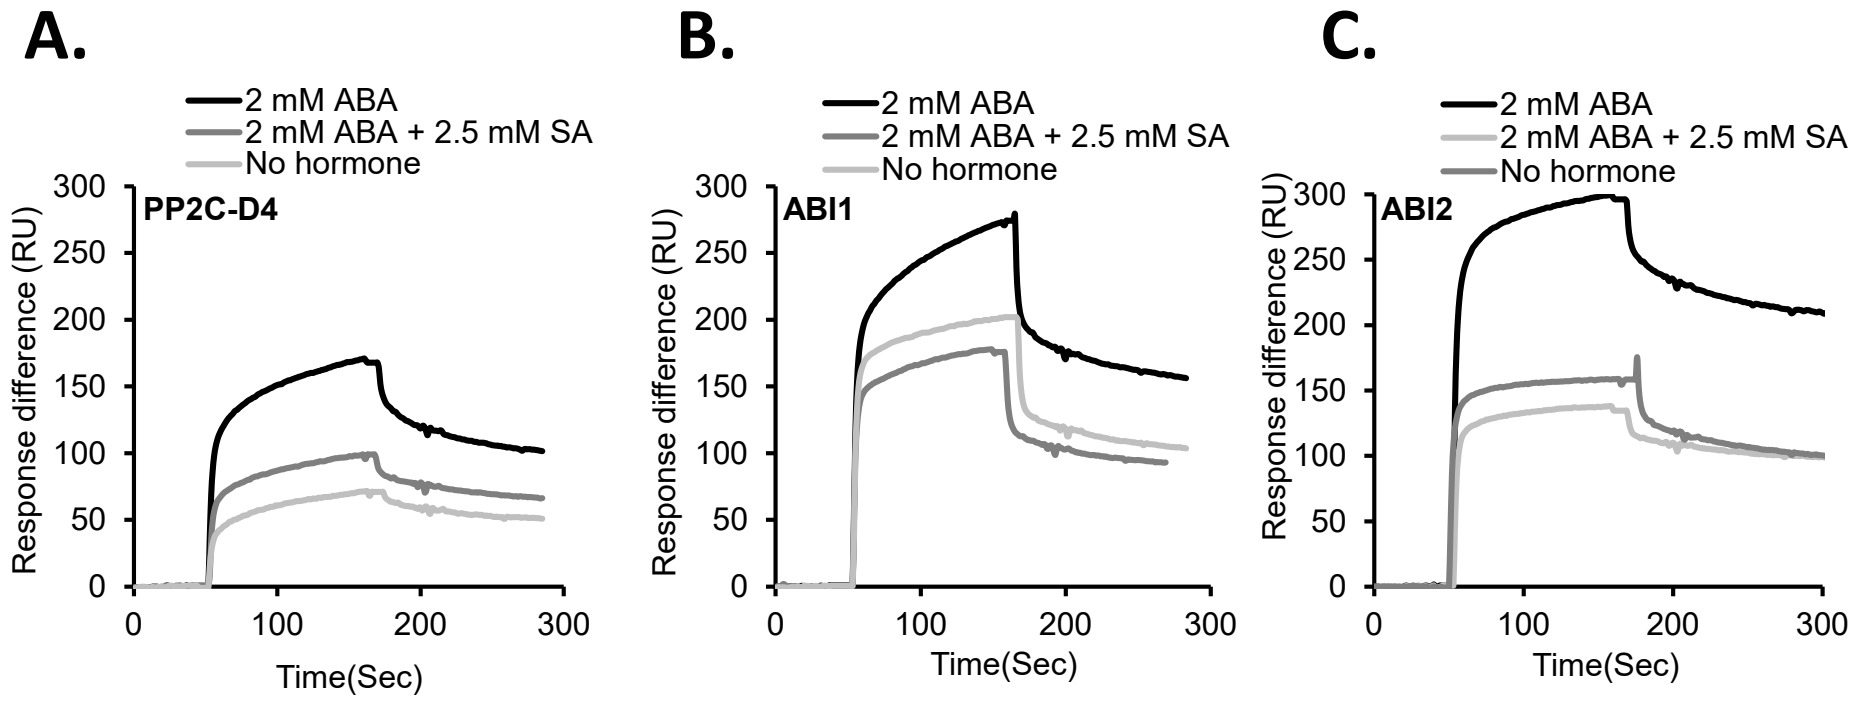

# Figure 3

## A.

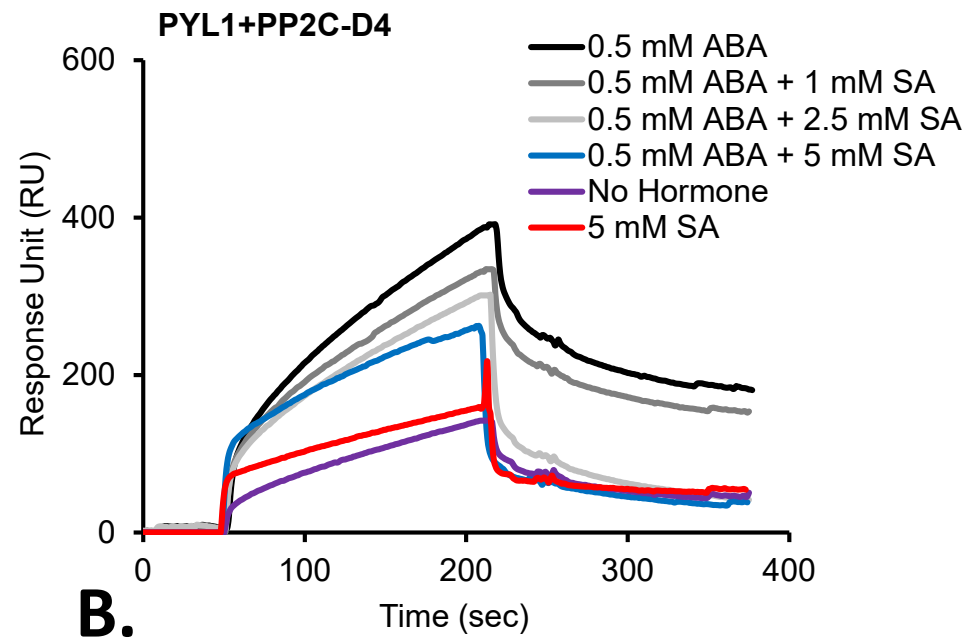

## C.

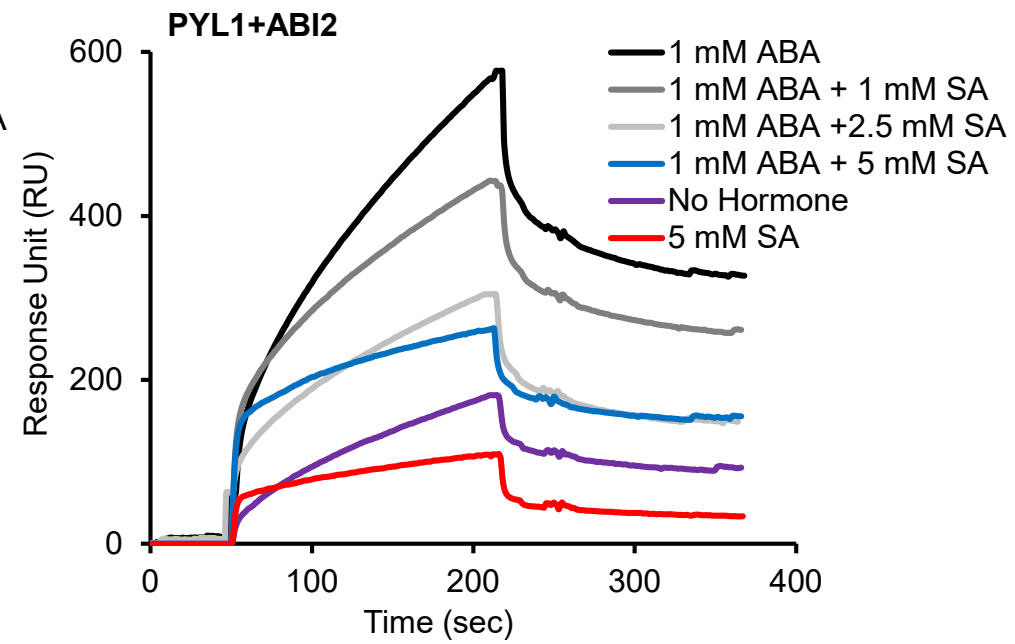

## B.

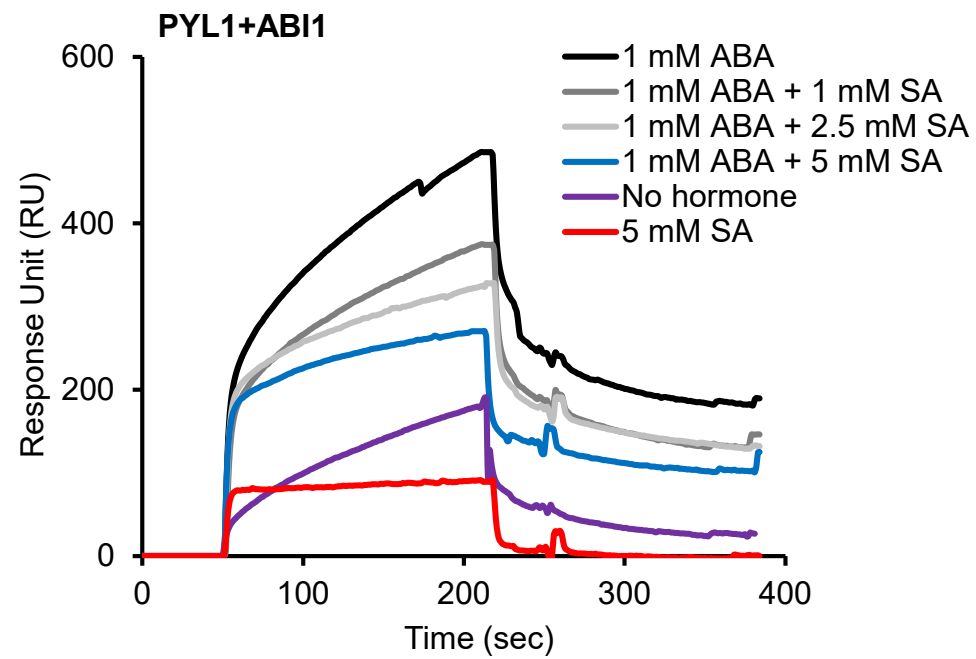

**Figure 4**

**A.**

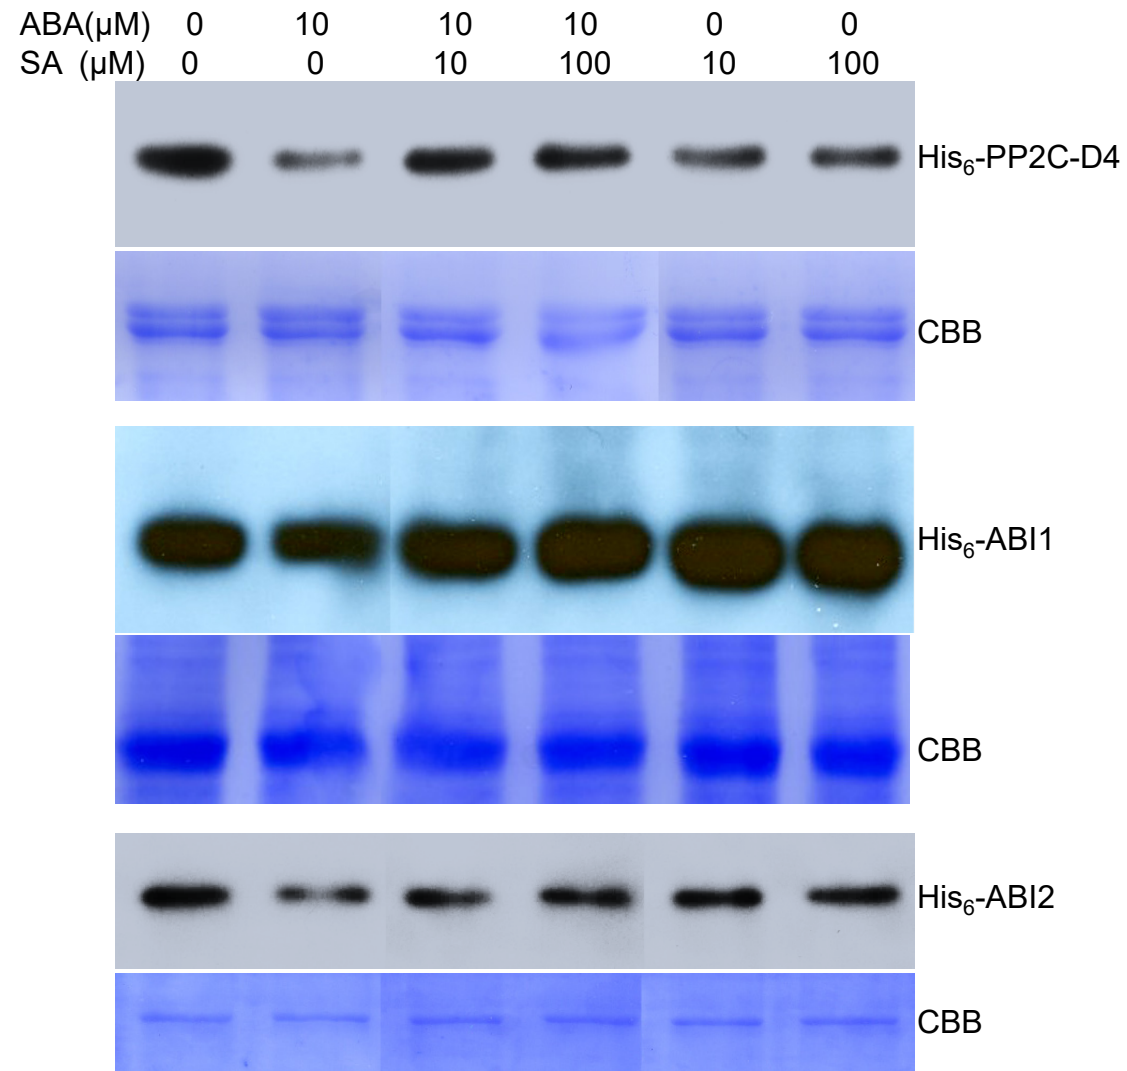

**B.**

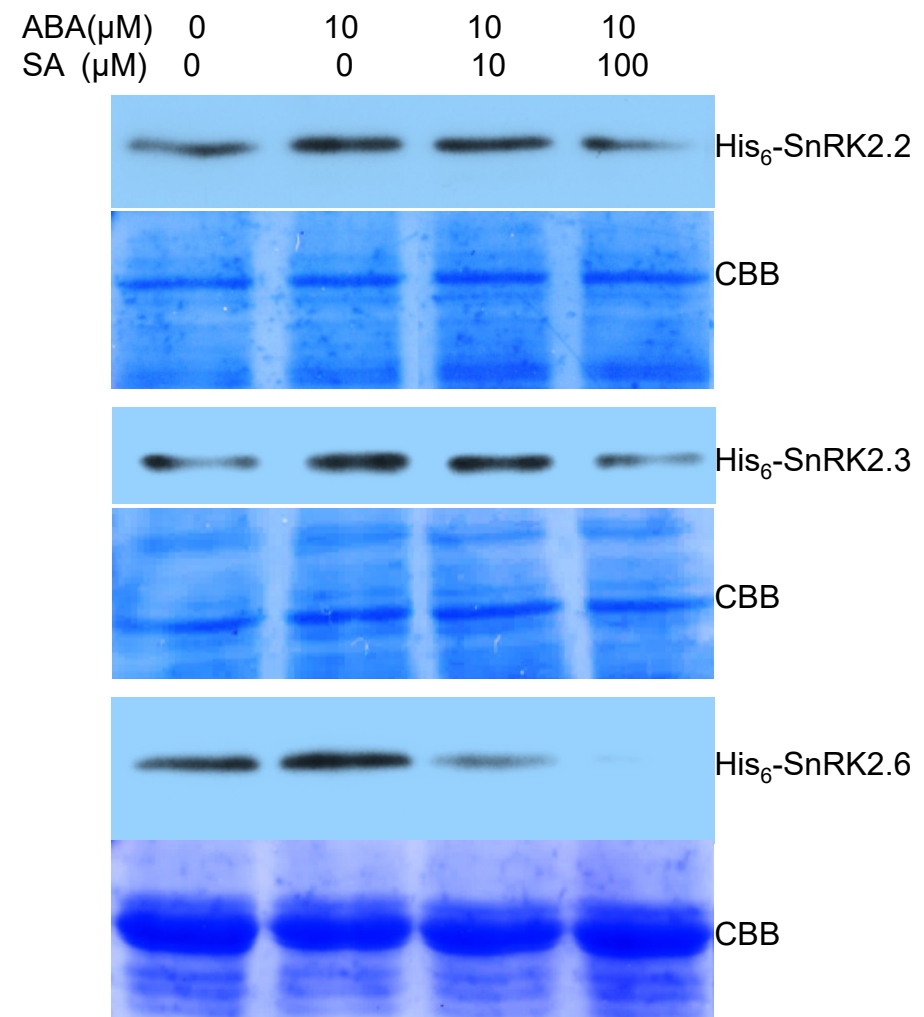

**C.**

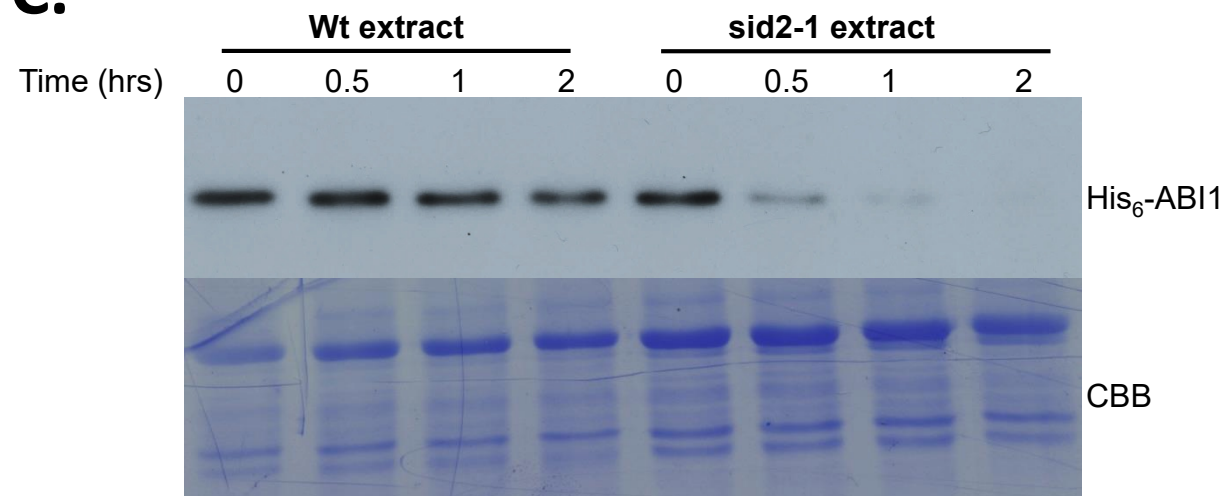

**Figure 5**

**A.**

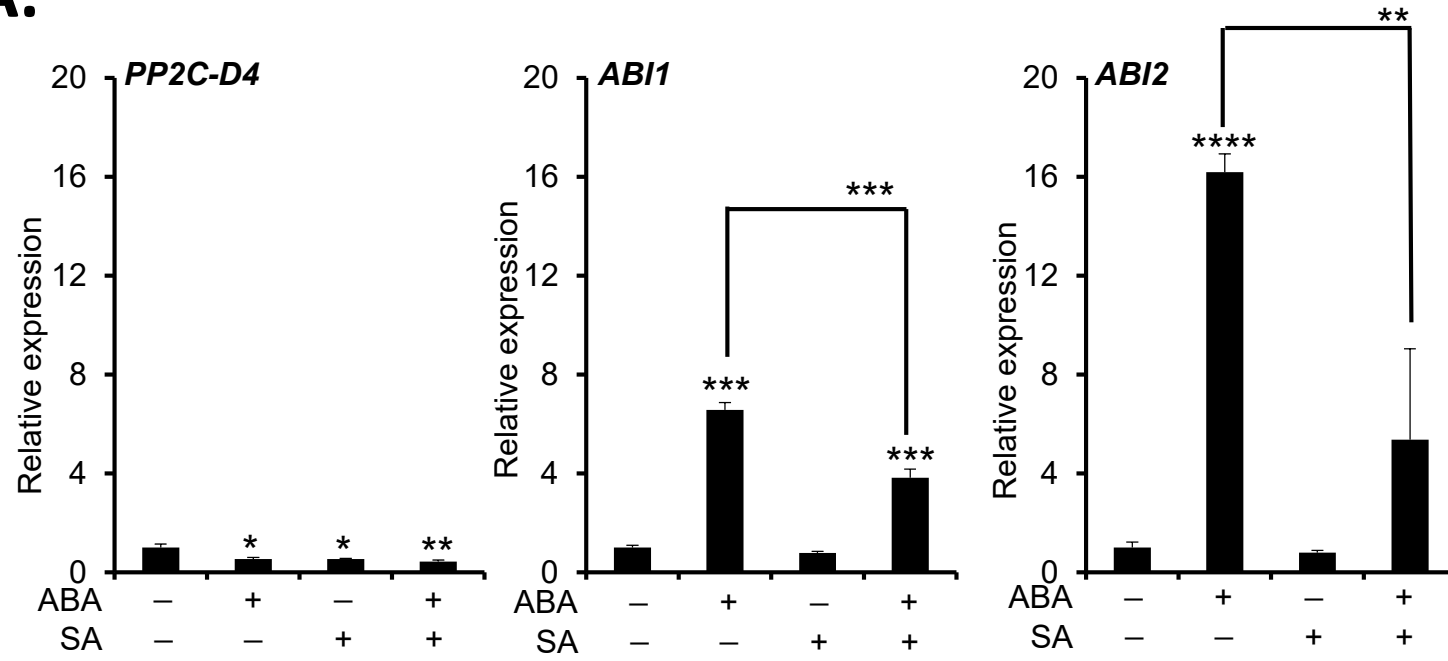

**B.**

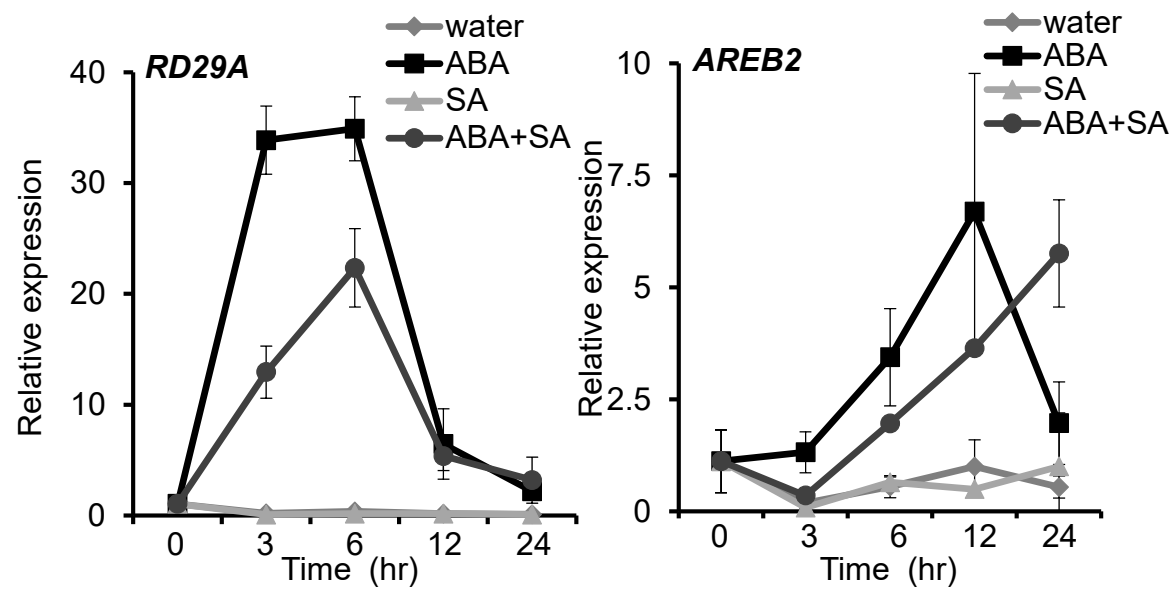

Figure 6

A.

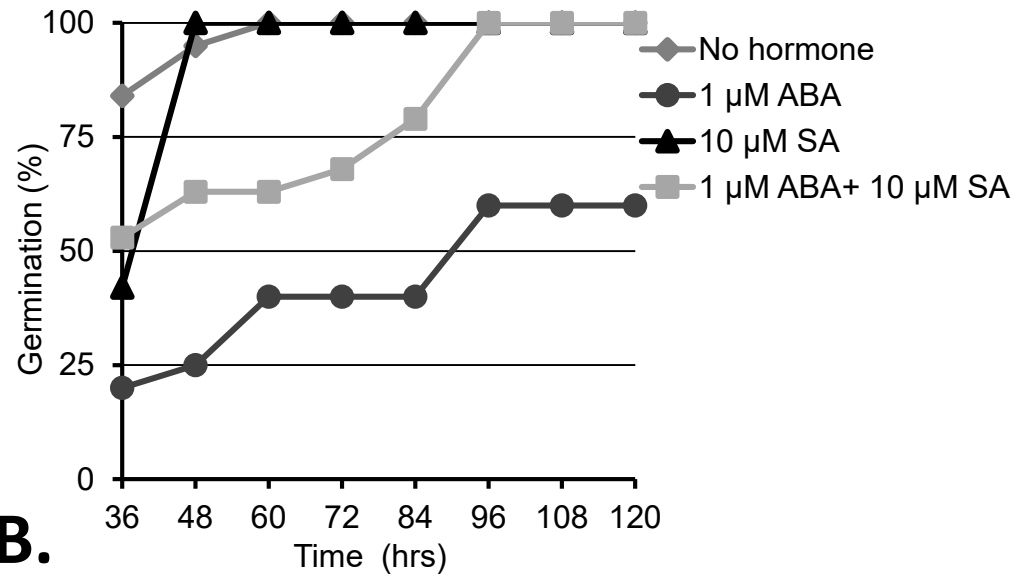

B.

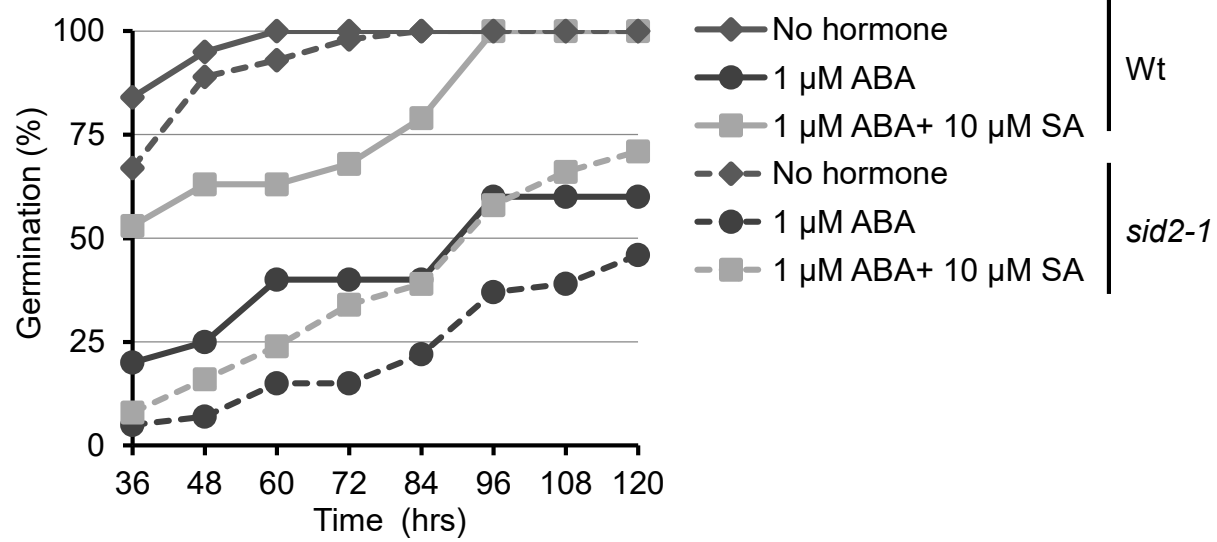

Figure 7

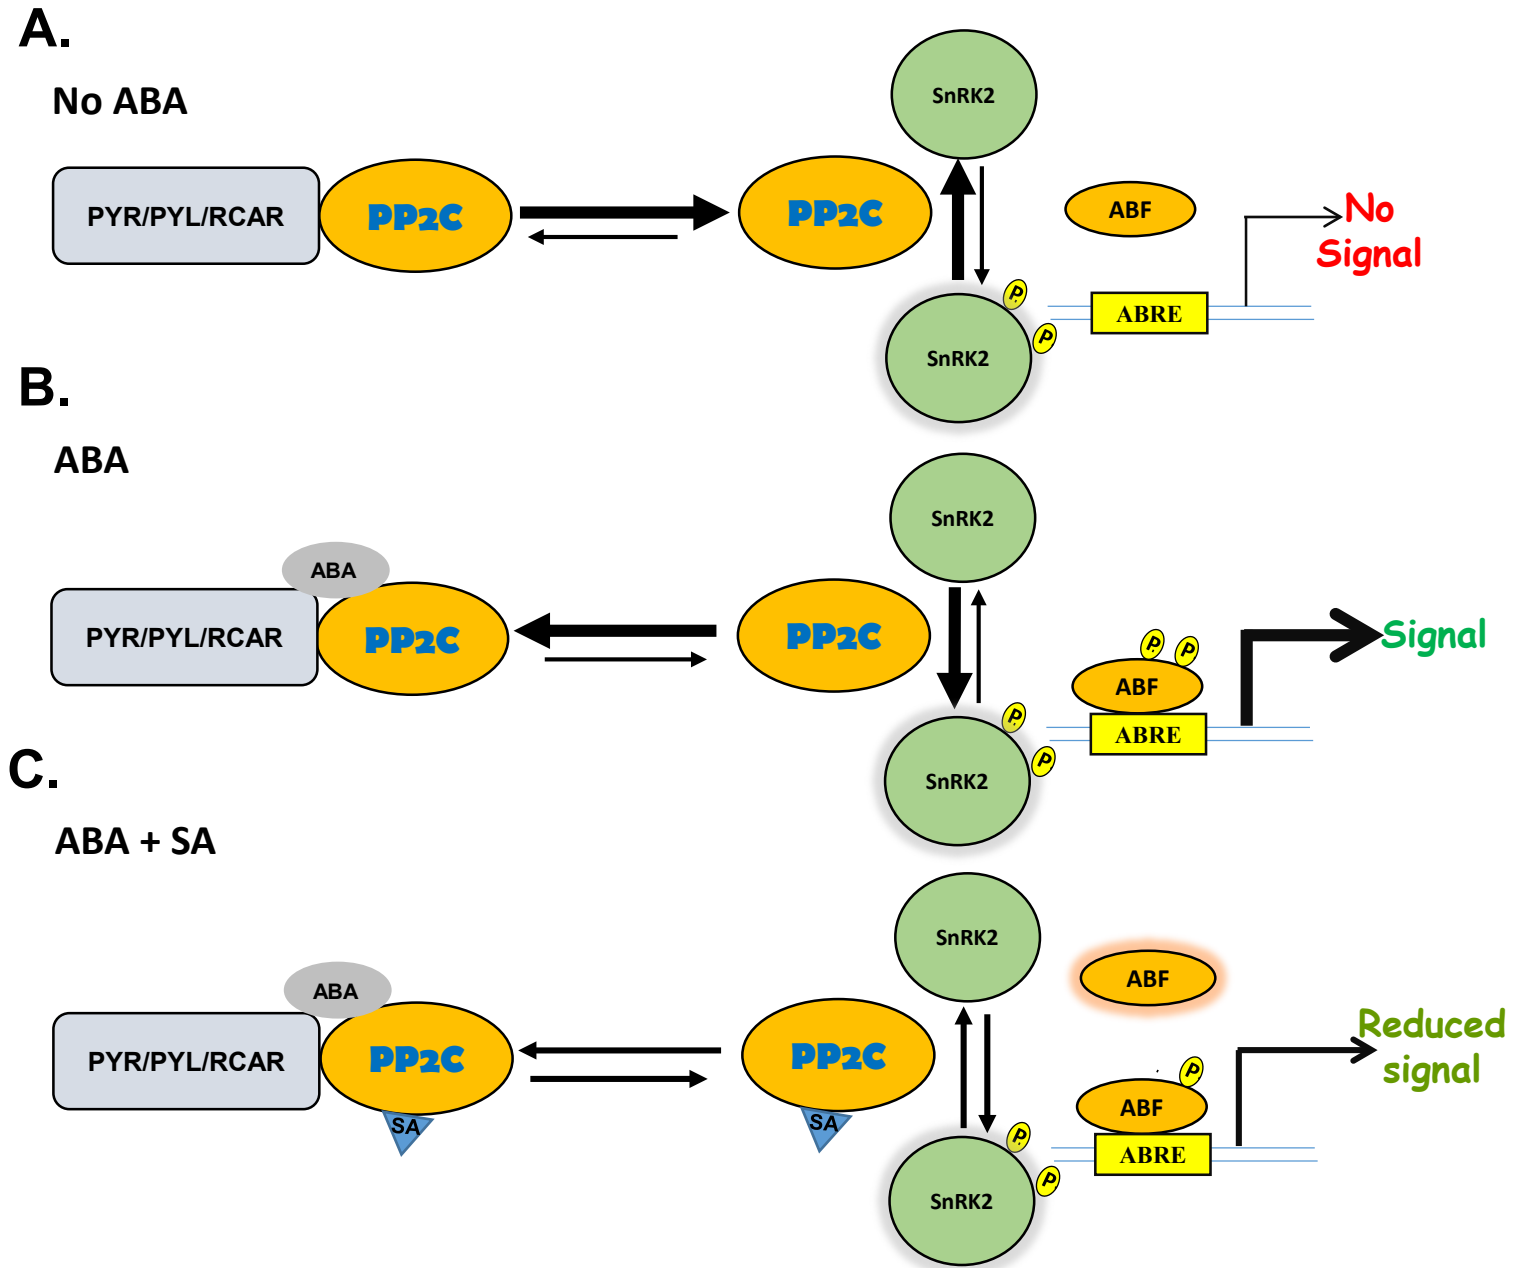

# Supporting Figure 1

**A.**

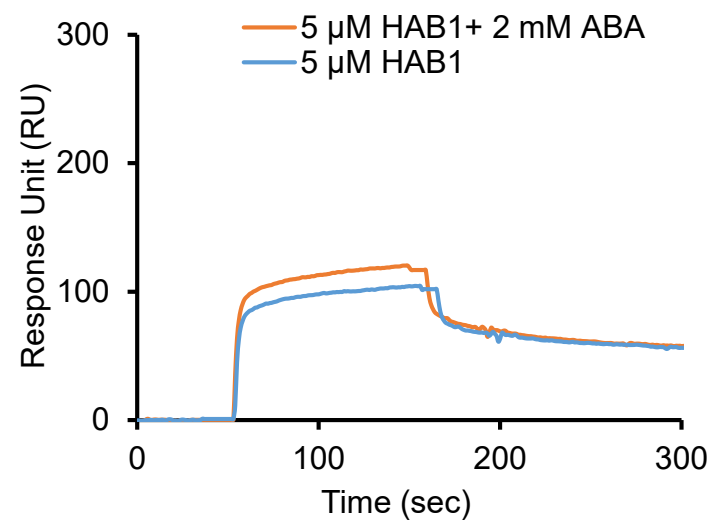

**B.**

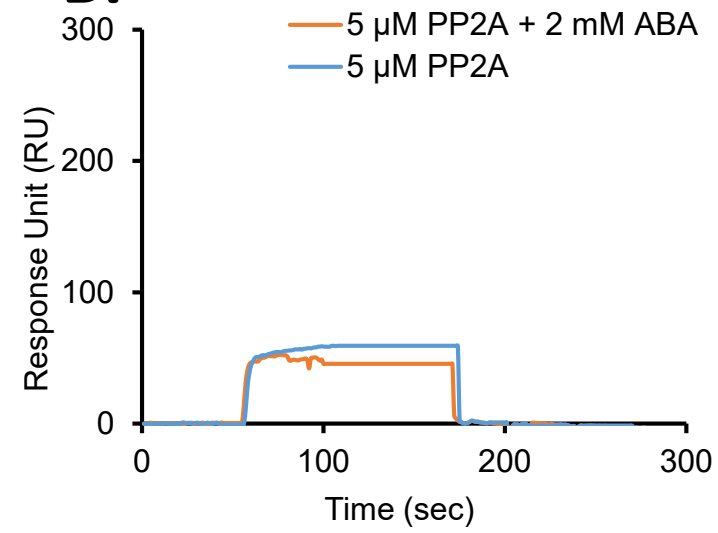

**C.**

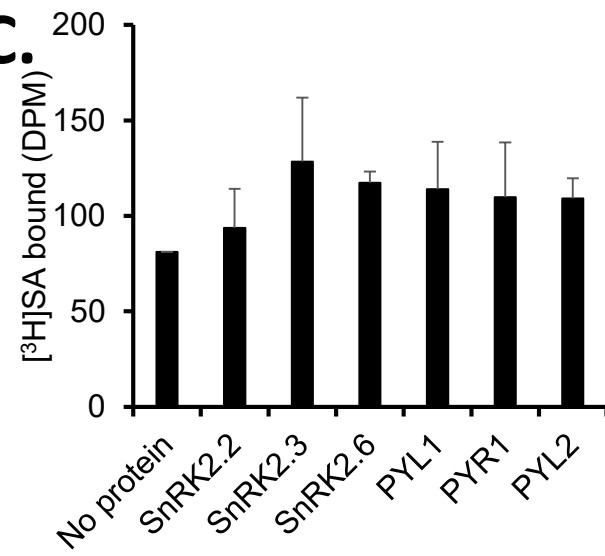

**D.**

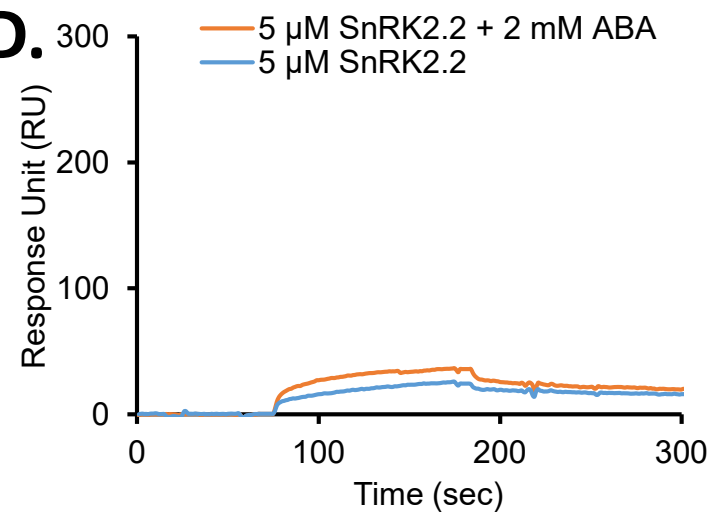

# Supporting Figure 2

**A.**

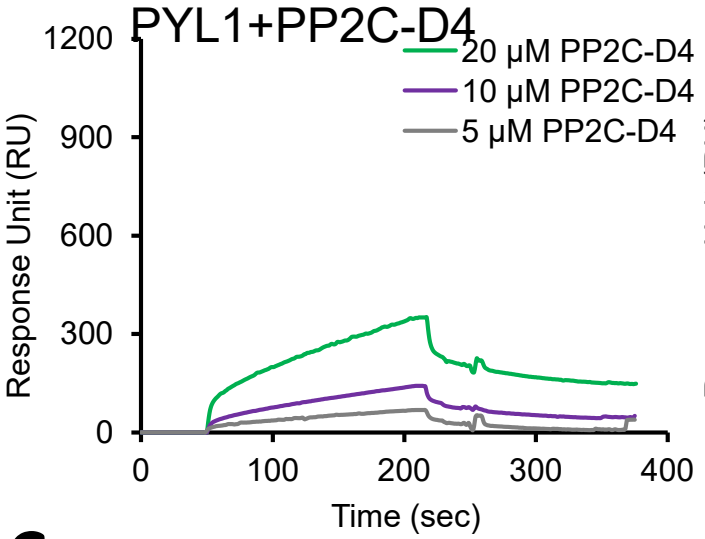

**B.**

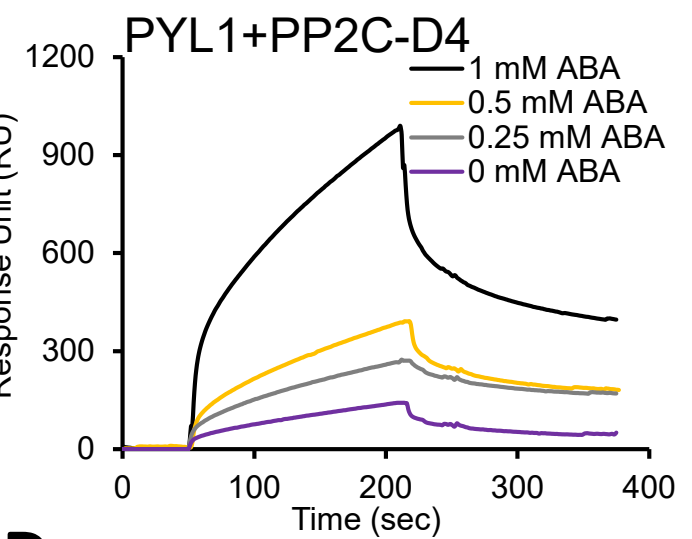

**C.**

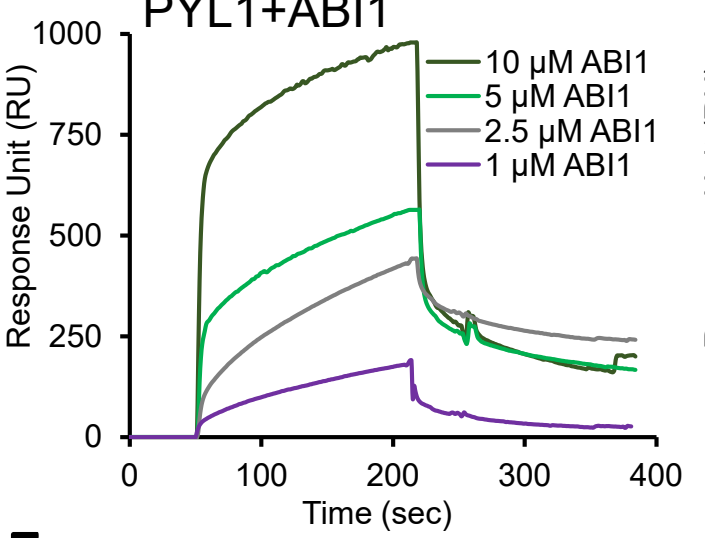

**D.**

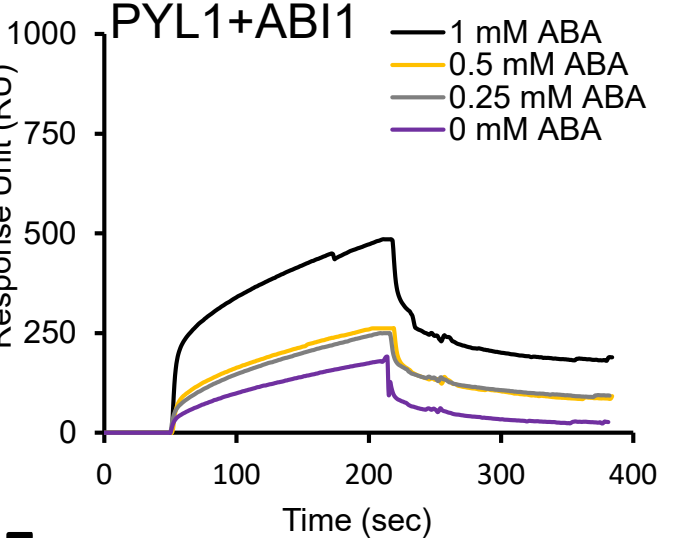

**E.**

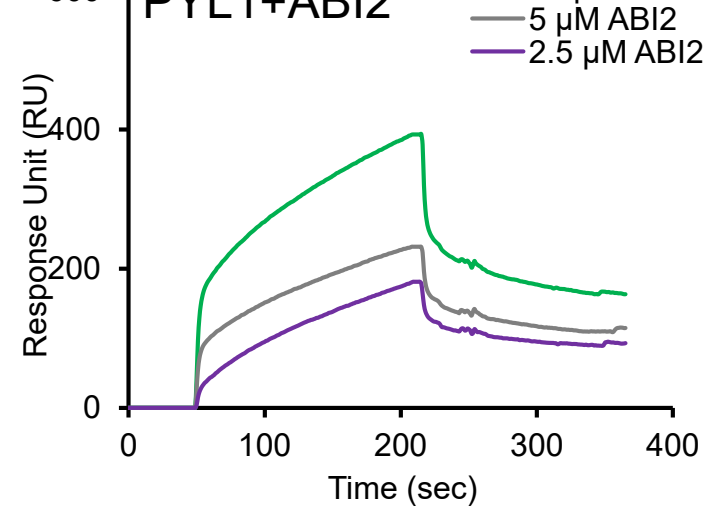

**F.**

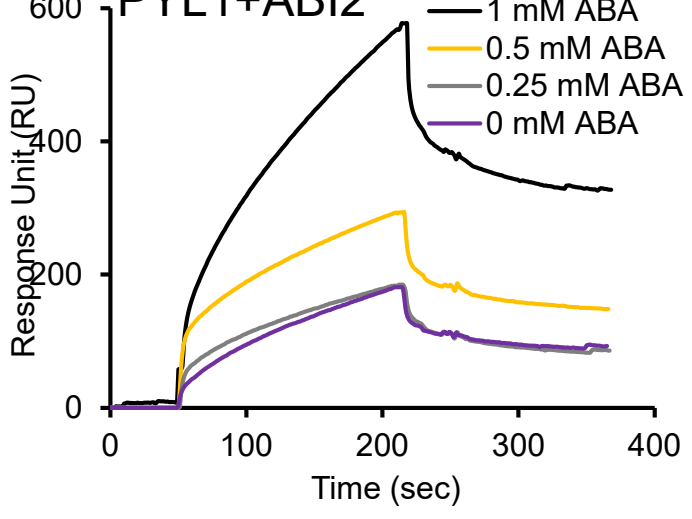



# Supporting Figure 3

**A.**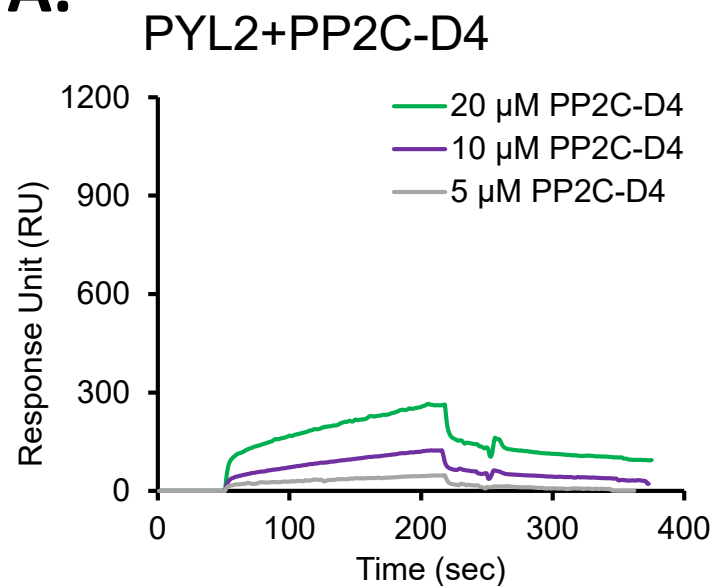**B.**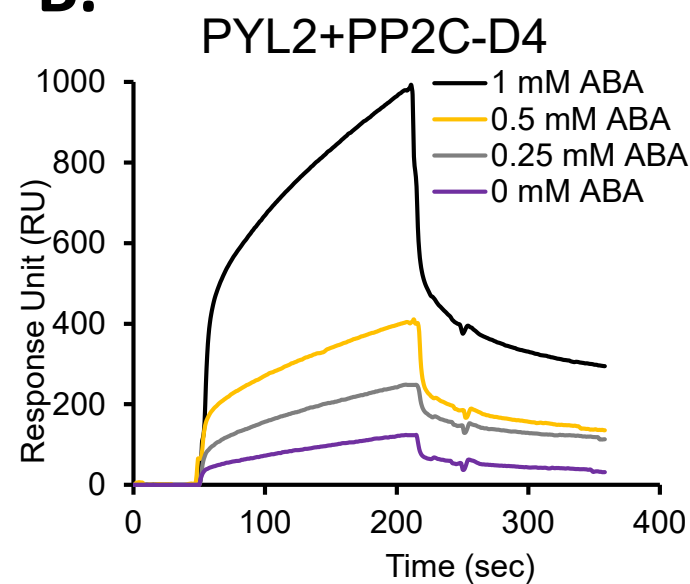**C.**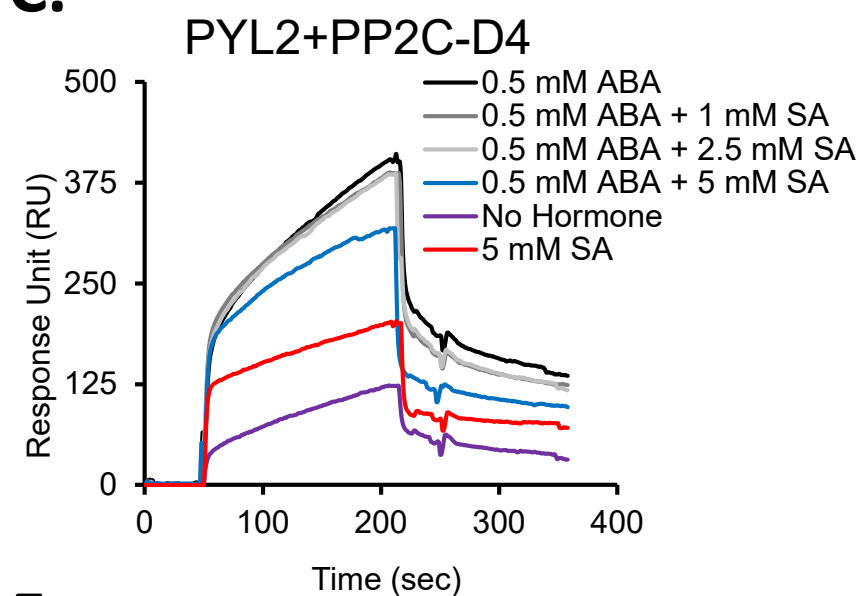**D.**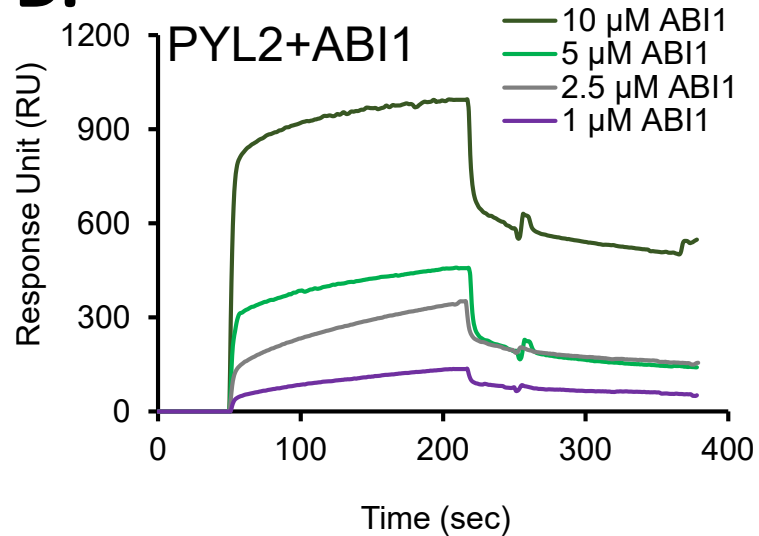**E.**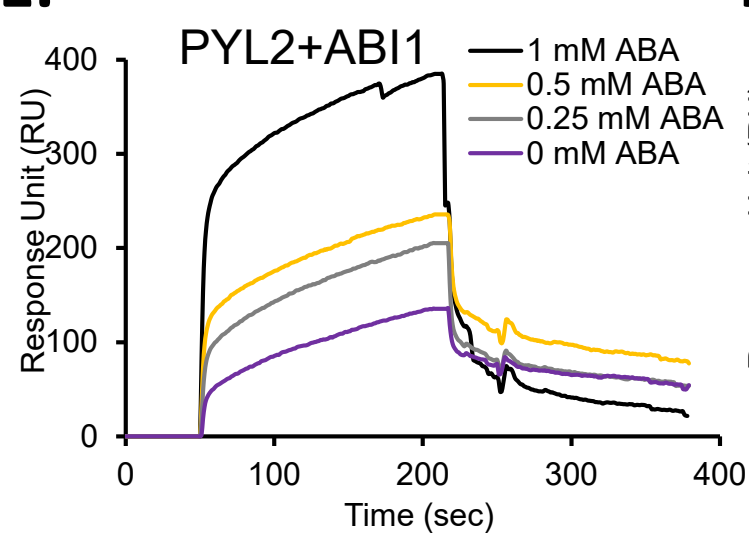**F.**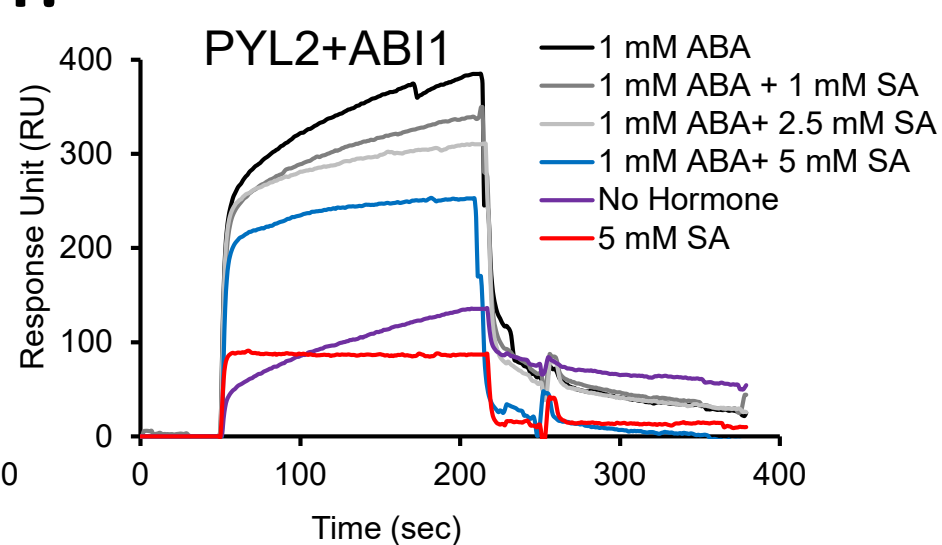**G.**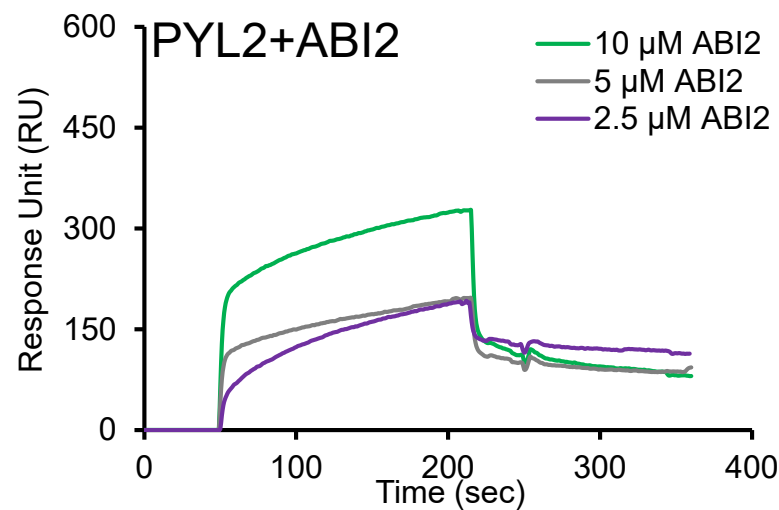**H.**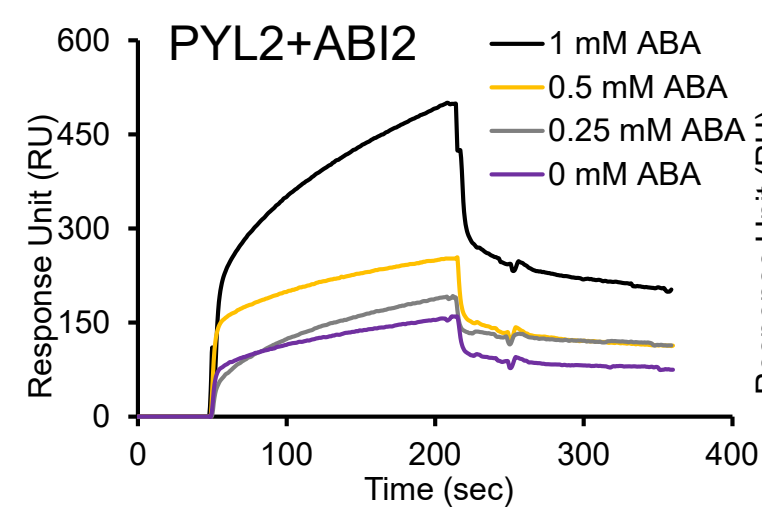**I.**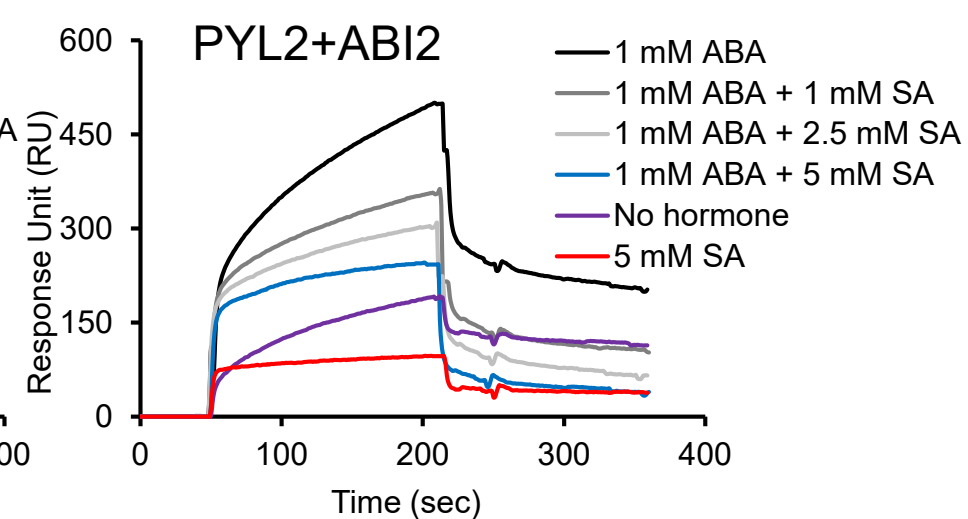

# Supporting Figure 4

## A.

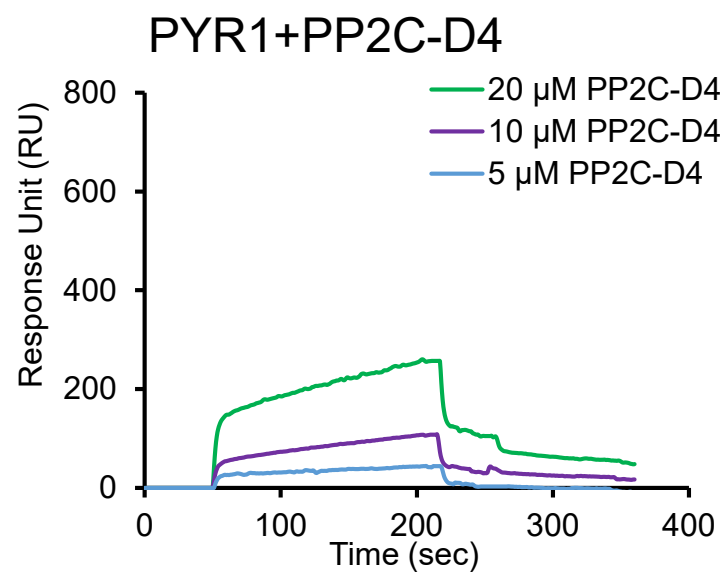

## B.

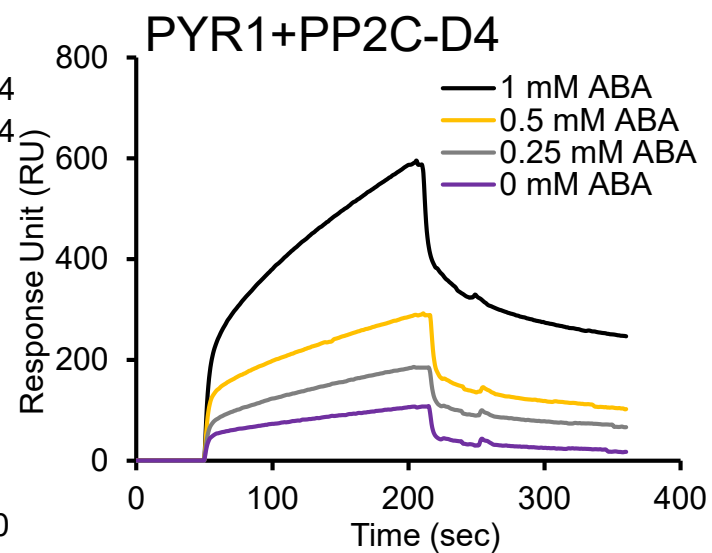

## C.

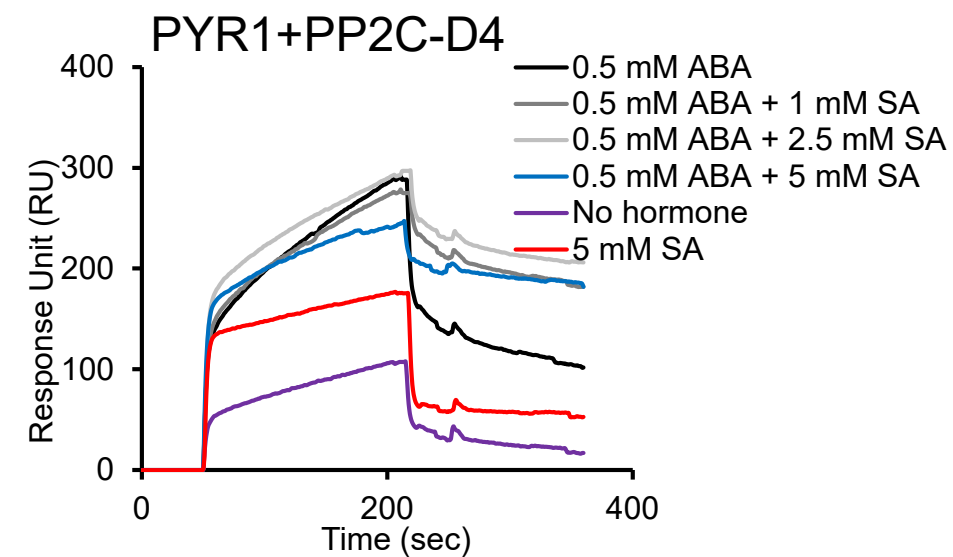

## D.

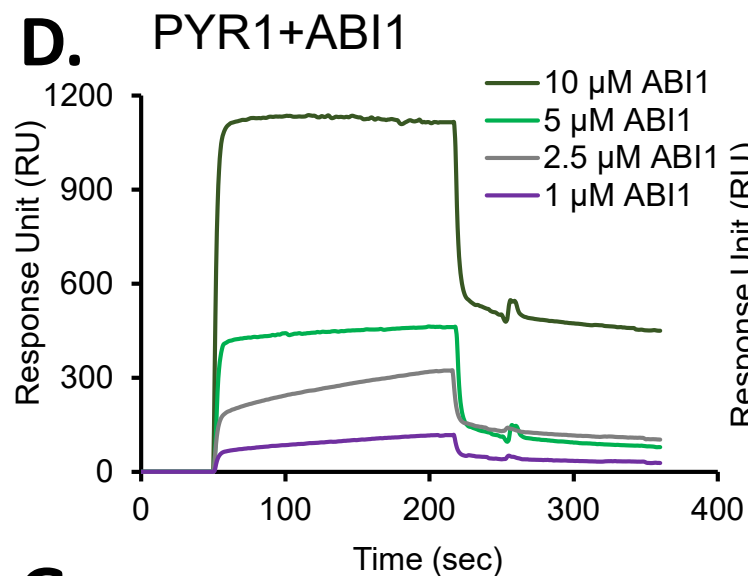

## E.

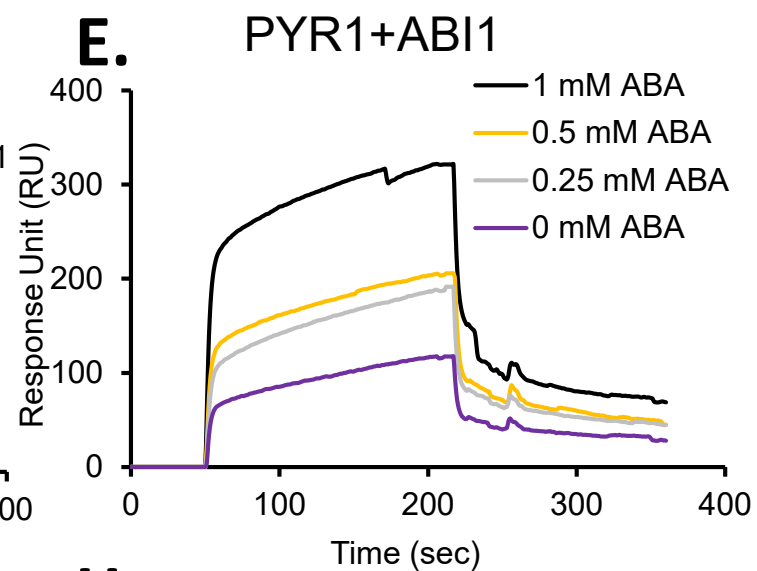

## F.

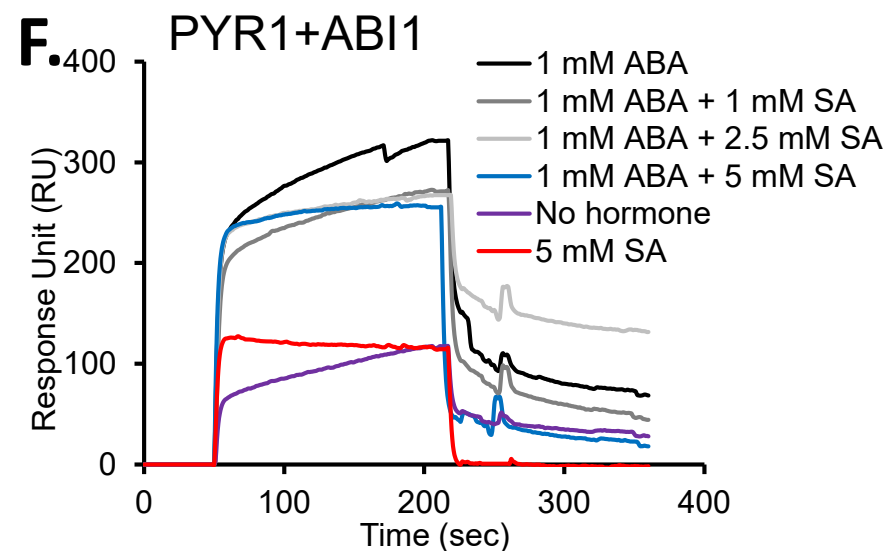

## G.

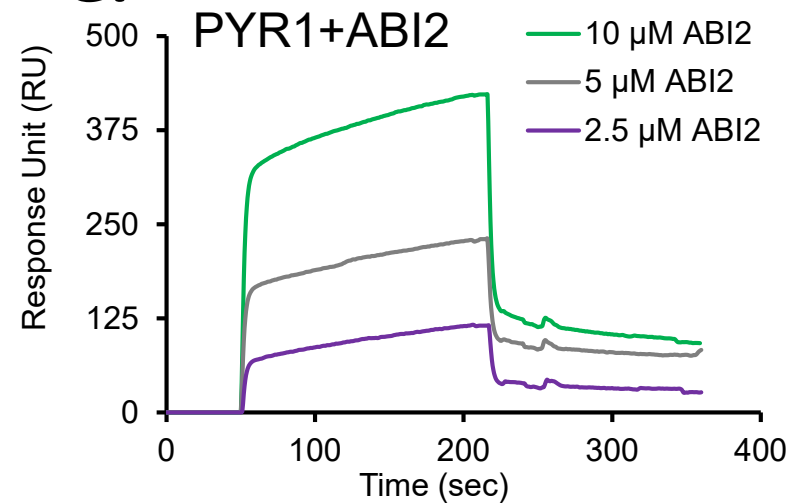

## H.

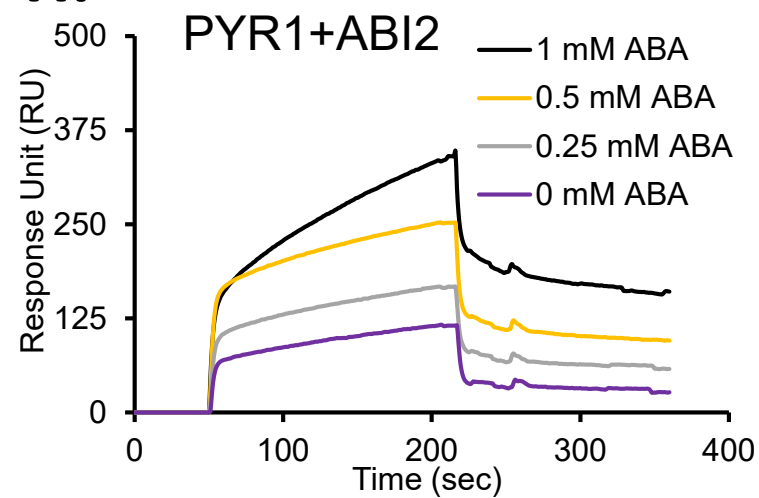

## I.

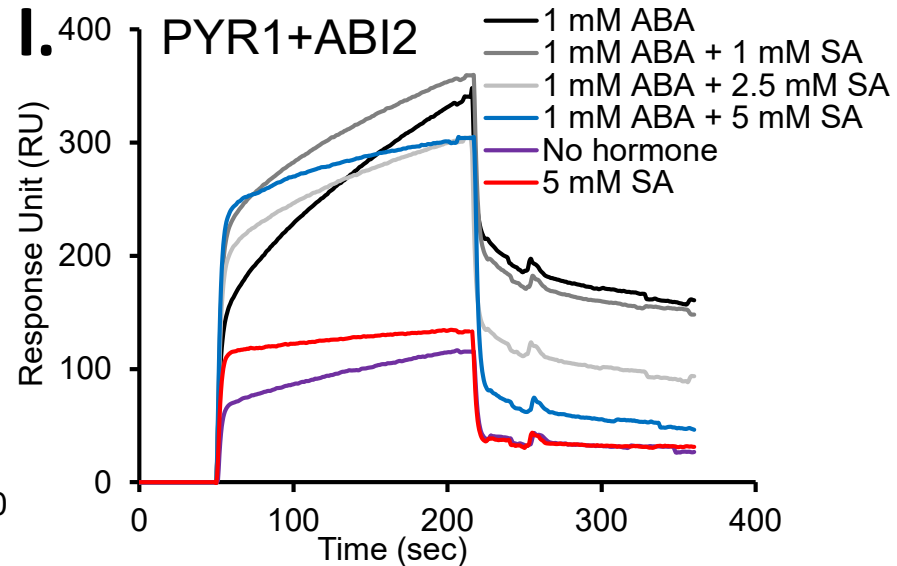

# Supporting Figure 5

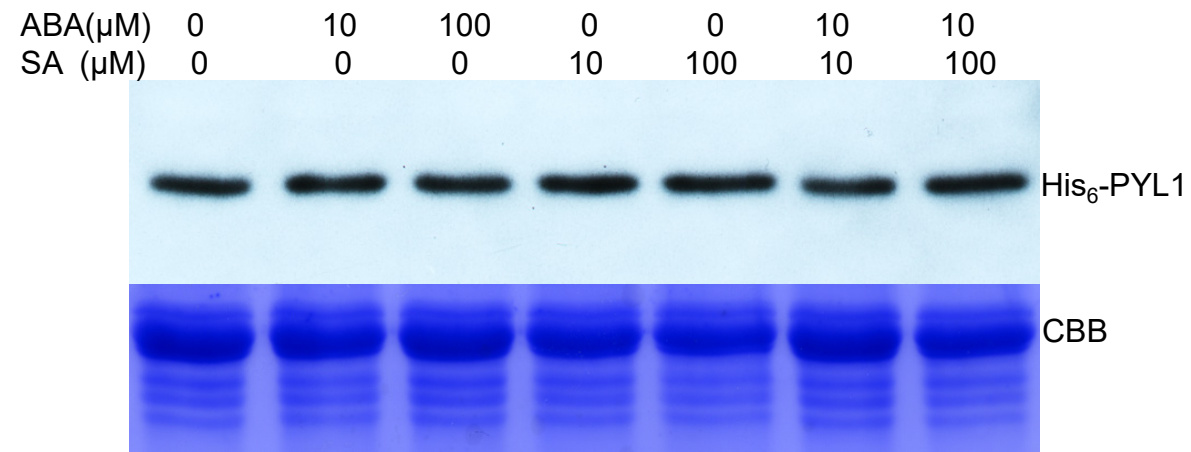

# Supporting Figure 6

**A.**

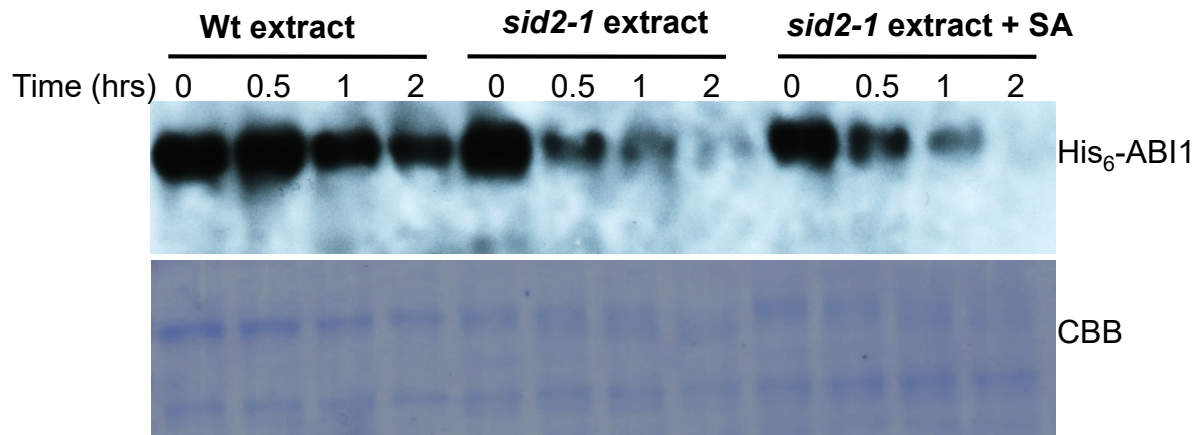

**C.**

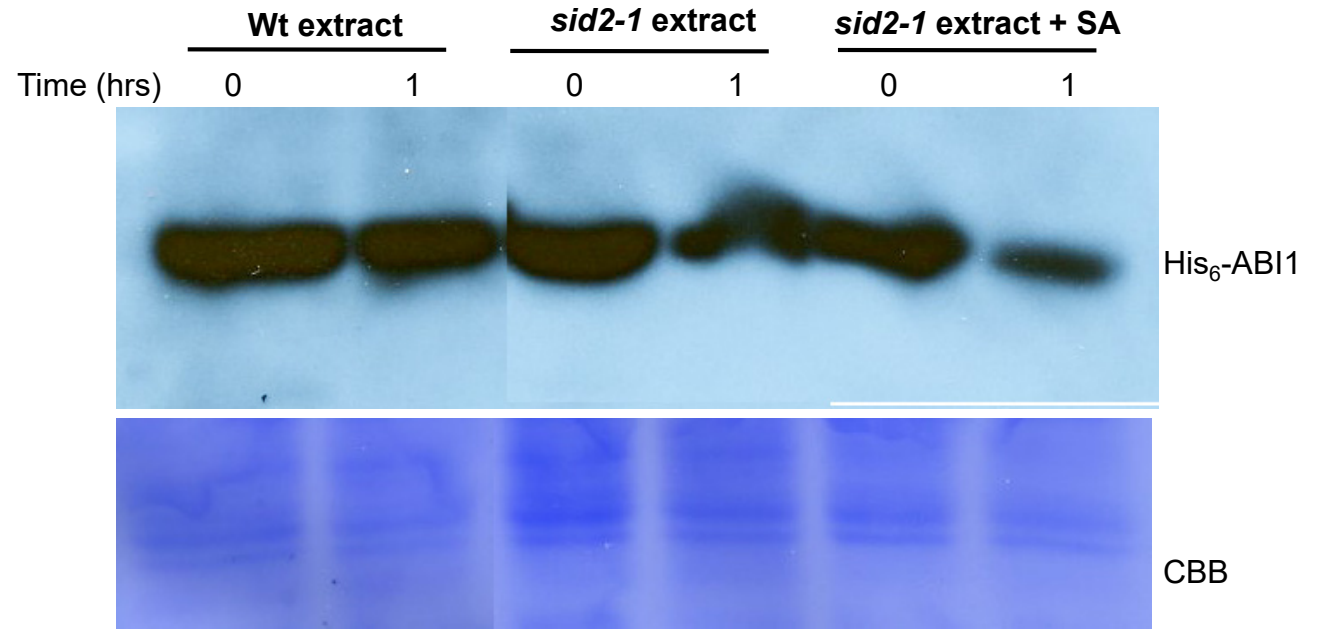

**B.**

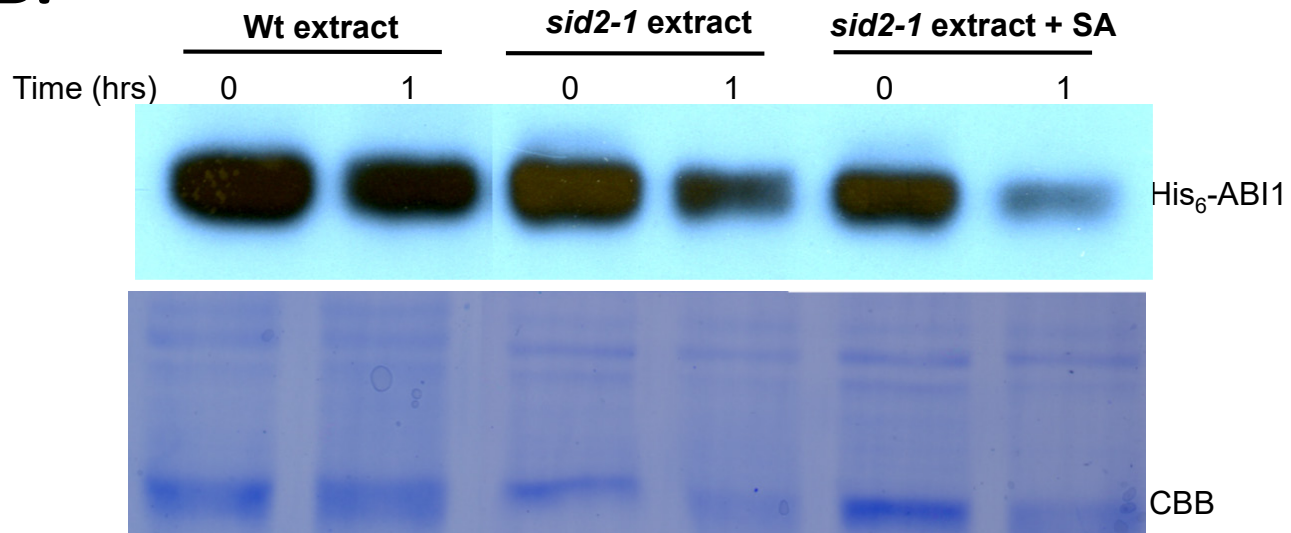

Source: https://www.biorxiv.org/content/10.1101/123059v1.full.pdf
